Version dated: March 16, 2015

# Introgression obscures and reveals historical relationships among the American live oaks

RH: INTROGRESSION IN THE AMERICAN LIVE OAKS

DEREN A. R. EATON<sup>1</sup>, ANDREW L. HIPPI<sup>2,3</sup>, ANTONIO GONZÁLEZ-RODRÍGUEZ<sup>4</sup> AND  
JEANNINE CAVENDER-BARES<sup>5,\*</sup>

<sup>1</sup>*Department of Ecology and Evolutionary Biology, Yale University, New Haven, CT 06511, USA.* <sup>2</sup>*The Morton Arboretum, Lisle, IL 60532, USA.* <sup>3</sup>*Department of Botany, The Field Museum, Chicago, IL 60605, USA.* <sup>4</sup>*Centro de Investigaciones en Ecosistemas, Universidad Nacional Autónoma de México, Morelia, Michoacán 58190, Mexico.* <sup>5</sup>*Department of Ecology, Evolution and Behavior, University of Minnesota, Saint Paul, MN 55108, USA.* \**To whom correspondence should be addressed (cavender@umn.edu).*

Data availability: NCBI sequence read archive: SRP055977; Zenodo DOI: xxx-yyy

Word count: 7480

Tables: 3

Figures: 4

Supplemental Tables: 2

Supplemental Figures: 4

Conflicts of interest: None

19

## Abstract

20

Introgressive hybridization challenges the concepts we use to define species and infer phylogenetic relationships. Methods for inferring historical introgression from the genomes of extant species are now widely used, however, few guidelines have been articulated for how best to interpret results. Because these tests are inherently comparative, they are sensitive to the effects of missing data (unsampled species) and non-independence (hierarchical relationships among species). We demonstrate this using genomic RADseq data sampled from all extant species in the American live oaks (*Quercus* series *Virentes*), a group notorious for hybridization. By considering all species, and their phylogenetic relationships, we were able to distinguish true hybridizing lineages from those that falsely appear admixed. Six of seven species show evidence of admixture, often with multiple other species, but which is explained by hybrid introgression among few related lineages occurring in close proximity. We identify the Cuban oak as the most admixed lineage and test alternative scenarios for its origin. The live oaks form a continuous ring-like distribution around the Gulf of Mexico, connected in Cuba, across which they could effectively exchange alleles. However, introgression appears highly localized, suggesting that oak species boundaries, and their geographic ranges have remained relatively stable over evolutionary time.

21

22

23

24

25

26

27

28

29

30

31

32

33

34

35

36

Keywords: hybridization, RADseq, admixture, phylogeny, *Quercus*, Cuba

37

## INTRODUCTION

38

Introgressive hybridization is a common phenomenon among biological organisms, including our own species (Green *et al.* 2010). It impacts how we understand the nature of species and infer their historical relationships, with important implications for conservation and biodiversity research (Rhymer & Simberloff 1996). Because introgression between divergent lineages can

39

40

41

42 give rise to genetically admixed individuals and populations that are heterogeneously distributed  
43 in space and/or time (Avice 2000, Petit & Excoffier 2009), sampling such individuals will  
44 generally bias estimates for the order and timing of species divergences (Leaché *et al.* 2014). Yet  
45 phylogenetic studies rarely sample a sufficient number and variety of individuals to detect  
46 whether admixture is present, or variable within species. Similarly, the common practice of  
47 excluding apparent hybrid individuals from phylogenetic studies prevents researchers from  
48 evaluating their influence on phylogeny. To the extent that introgression is common, the practice  
49 of sparse sampling in phylogenetics will underestimate its frequency, and in doing so infer an  
50 inflated role for stochastic processes, such as incomplete lineage sorting (Maddison & Knowles  
51 2006), in explaining discordant genealogical relationships.

52         Recent years have seen the development of new methods for inferring admixture from the  
53 genomes of extant species (Green *et al.* 2010, Durand *et al.* 2011), the results from which are  
54 often interpreted as evidence of hybrid introgression between their ancestors. Connecting pattern  
55 (admixture) and process (introgression) in this way is a difficult problem, however, and one that  
56 similarly suffers from the effects of sparse taxon sampling. To account for such effects, we  
57 highlight two important considerations that should generally be taken into account. First, the  
58 problem of missing samples: when the true source of introgression is not sampled (i.e., it is a  
59 ghost lineage) the source will usually be incorrectly attributed to the sampled population most  
60 closely related to the ghost lineage (Durand *et al.* 2011, Eaton & Ree 2013, Rogers & Bohlender  
61 In Press). In practice, the extent to which truly spurious conclusions would be drawn from  
62 sampling a closest available (or extant) lineage will generally depend on the size of the clade to  
63 which hybridizing lineages belong, and their rate of ecological or morphological divergence.  
64 Diverse clades would require very dense sampling to identify that a species or population that  
65 appears admixed does not have a close relative harboring a yet stronger signal of admixture.

66         A second and related consideration is that even when all relevant lineages are sampled in a  
67 study, it still remains difficult to distinguish a history of introgression between two populations

68 from a signal of admixture between those populations that can arise when one species harbors  
69 introgressed alleles from a close relative of the other (Eaton & Ree 2013). To distinguish true  
70 introgression from such secondary genomic admixture, introgression must be considered in an  
71 explicitly hierarchical (phylogenetic) context, rather than on a species-by-species basis. For  
72 example, suppose there are two species, A and D, which exchanged alleles at some time in the  
73 past. Species A is member of a clade including several other species (B and C) with which it  
74 shares many derived alleles since their divergence from D. As a consequence of their relatedness,  
75 introgression from species A into D will necessarily introduce alleles that it also shares with its  
76 close relatives, which can give the appearance (admixture) that B and C also hybridized with D.  
77 To identify whether the relatives of A independently introgressed into D, versus whether they  
78 simply share ancestry with the true hybridizing lineage, requires not only sampling all relevant  
79 lineages in the clade, but also accounting for their phylogenetic structure.

80 Oaks (*Quercus*) are notorious for hybridization (Hardin 1975, Burger 1975) to the extent  
81 they have been dubbed a “worst case scenario for the biological species concept” (Coyne & Orr  
82 2004). For this reason, they also provide a compelling case study for investigating introgression at  
83 the clade level, among multiple interacting species. Within the genus, the American live oaks  
84 (*Quercus* section *Virentes* Nixon) form a young clade of seven ecologically divergent species that  
85 span a range of climatic regimes from the seasonal dry tropics to the temperate zone (Muller  
86 1961, Nixon 1984, Cavender-Bares *et al.* 2011; In Press). They include both narrow endemics  
87 and widespread species that collectively cover the southeastern US, eastern Mexico, southern  
88 Baja, Central America, and Cuba (Fig. 1A). The species are all diploid and interfertile, and many  
89 occur in sympatry throughout all or parts of their range. A complex history of hybridization has  
90 likely contributed to difficulties in resolving their phylogenetic relationships (Cavender-Bares &  
91 Pahllich 2009, Gugger & Cavender-Bares 2013).

92 The live oaks are part of a predominately American oak clade (Hipp *et al.* 2014, Pearse &  
93 Hipp 2009) comprising sections *Quercus* (the white oaks *sensu stricto*, including the live oaks of

94 the Americas and roburoids of Eurasia), *Lobatae* Loudon (the red or black oaks), and  
95 *Protobalanus* (Trelease) A.Camus (the intermediate or golden oaks). The red and white oak  
96 clades became morphologically distinct ca. 23–33 (Borgardt & Pigg 1999). Although hybrids are  
97 commonly observed within each major section (Hardin 1975), hybrid swarms are uncommon, as  
98 is hybridization between major sections (Muller 1961). The live oaks are sister to the remainder  
99 of the white oaks, making them phylogenetically distant and isolated from all other oak species,  
100 and thus a manageable system in which to reconstruct a clade-level history of introgression.

101 Here we utilize restriction-site associated DNA sequencing (RADseq) (Baird *et al.* 2008)  
102 to sample thousands of genomic regions across a large number of samples for phylogenetic  
103 inference, and to test introgression between lineages. A recent study demonstrating high  
104 conservation of RAD sequences across a phylogenetic scale spanning more than 40 Mya in the  
105 American clade oaks (Hipp *et al.* 2014) motivates our current study. While genetic admixture has  
106 been previously described in the live oaks between focal species pairs (Cavender-Bares & Pahllich  
107 2009, Gugger & Cavender-Bares 2013), this is the first study to bring genome-scale data to bear  
108 on the question, and more importantly, to investigate introgression among all extant species in the  
109 clade simultaneously and within a phylogenetic context.

110 We focus particular attention to resolving the phylogenetic placement of the Cuban oak  
111 species, *Q. sagraeana*. The origin of this isolated and distinct taxon has long puzzled  
112 systematists: its origin has been variously ascribed to one or more species in Florida, to a Central  
113 American species, or to hybridization among other live oaks (Muller 1961, Nixon 1984, Gugger  
114 & Cavender-Bares 2013). Chloroplasts are commonly exchanged between sympatric oak species  
115 (Whittemore & Schaal 1991, Petit *et al.* 1997), and consequently chloroplast DNA (cpDNA)  
116 haplotypes exhibit little species specificity compared to nuclear markers (Petit & Excoffier 2009,  
117 Dumolin-Lapegue *et al.* 1999). The cpDNA haplotype common in Cuba is also shared with both  
118 of its hypothesized parent lineages, and is thus inconclusive about the biogeographic origins of  
119 the species (Gugger & Cavender-Bares 2013). Using >70K RAD loci sequenced from multiple

120 individuals across the geographic ranges of all seven extant species of live oaks, we ask the  
121 following: (1) Which lineages have experienced hybrid introgression? (2) How does admixture  
122 affect phylogenetic inference? (3) Can we tease apart non-independent signals of admixture  
123 among multiple closely related species? And (4) what is the origin of the Cuban oak?

## 124 MATERIALS AND METHODS

### 125 *Sampling*

126 Four to five individuals were sampled from across the geographic range of each of the seven live  
127 oak species for RAD sequencing (Fig. 1A), in addition to seven outgroup samples (Four  
128 non-*Virentes* white oaks: *Q. engelmannii*, *Q. arizonica*, *Q. durata*, *Q. douglasii*; one golden oak:  
129 *Q. chrysolepis*; and two red oaks: *Q. nigra*, *Q. hemisphaerica*). Leaf samples were collected from  
130 wild plants (live oaks) or plants grown in the University of Minnesota greenhouse (outgroup  
131 samples). Identification to species was based on leaf, bark, and stem height characters following  
132 Muller (1961), Kurz & Godfrey (1962), and Nixon & Muller (1997). Leaves were collected from  
133 wild plants in the field, maintained fresh during transport, and stored at -80C until extraction.  
134 Voucher specimens for all RAD sequenced individuals are housed in the University of Minnesota  
135 Bell Museum of Natural History (Table S1).

### 136 *RADseq preparation and sequencing*

137 DNA was extracted from fresh or frozen material using the DNeasy plant extraction protocol  
138 (DNeasy, Qiagen, Valencia, CA) as reported in Cavender-Bares & Pahlich (2009). RAD libraries  
139 were prepared by Floragenex Inc. (Eugene, Oregon) using the PstI restriction enzyme and  
140 sonication following the methods of Baird *et al.* (2008). An initial multiplex library was created

141 from 30 barcoded and pooled samples sequenced on an Illumina GAIIx sequencer to generate 100  
142 bp single end reads. To increase coverage a second library was prepared that included an  
143 additional 15 samples, seven of which were technical replicates of samples in the first library,  
144 sequenced on an Illumina HiSeq 2000 to generate 100 bp single end reads. After an initial  
145 analysis to check that technical replicates grouped together in phylogenetic analyses, they were  
146 combined, except for one replicate that may have been contaminated and was excluded. Two  
147 additional samples were discarded during bioinformatic analyses due to low sequencing coverage  
148 (“TXVW2” and “CUMM5”) resulting in 34 final samples.

### 149 *RADseq assembly*

150 Data were assembled into *de novo* loci using *pyRAD* v.2.13 (Eaton 2014). Quality filtering  
151 converted base calls with a score <20 into Ns and reads with >5 Ns were discarded. Illumina  
152 adapters and fragmented sequences were removed using the filter setting “1” in *pyRAD*. Filtered  
153 reads were clustered at two different thresholds for within-sample clustering, 85% and 92%, both  
154 of which yielded similar results, therefore we report only the 85% run. Error rate and  
155 heterozygosity were jointly estimated from aligned clusters for each sampled individual and the  
156 average parameter values were used when making consensus base calls. Clusters with a minimum  
157 depth of coverage <5 were excluded. Loci containing more than two alleles after error correction  
158 were excluded as potential paralogs (all taxa in this study are diploid). Consensus loci were then  
159 clustered across samples at 85% similarity and aligned. A final filtering step excluded any loci  
160 containing one or more sites that appear heterozygous across more than five samples, as we  
161 suspect this is more likely to represent a fixed difference among clustered paralogs than a true  
162 polymorphism at the scale of this study. The final assembly statistics appeared robust to the  
163 choice of filtering thresholds.

164 In addition to assembling full data sets, smaller matrices were also assembled in which  
165 taxa from one or two major clades were selectively excluded. This allowed phylogenetic

166 inference to be performed separately for each major clade in the live oaks, rooted by the  
167 outgroups, but without the influence of shared SNPs between taxa from distant ingroup clades.  
168 The motivation for this approach is that to the extent introgression has introduced  
169 synapomorphies between distant relatives, subsampling will censor their effect, making them  
170 appear instead as autapomorphies (Eaton & Ree 2013). To explore the effect of missing data we  
171 also assembled each data set with different minimums for sample coverage (the number of  
172 samples for which data must be recovered to include a RAD locus in the data set). A large but  
173 incomplete version required at least four samples have data for a locus (e.g., "Allmin4"), while a  
174 smaller more complete version was also assembled (e.g., "Allmin20"). In total, 15 data sets were  
175 generated. The source of missing data between samples was investigated using Mantel tests (9999  
176 permutations) that measured the Spearman's rank correlation between the Jaccard's distance of  
177 the proportion of shared loci between samples, pair-wise phylogenetic distance, and number of  
178 raw input reads.

### 179 *Phylogeny and population clustering*

180 For each assembled data set RAD loci were concatenated and missing data entered as Ns to create  
181 a phylogenetic supermatrix. Maximum likelihood (ML) trees were inferred in RAxML v.7.2.8  
182 (Stamatakis 2014) with bootstrap support estimated from 200 replicate searches from random  
183 starting trees using the GTR+ $\Gamma$  nucleotide substitution model.

184 To better visualize genomic variation within individuals we inferred population clustering  
185 with admixture from SNP frequency data within the program *Structure* v.2.3.1 (Pritchard *et al.*  
186 2000). To minimize missing data across individuals we used 14,011 putatively unlinked bi-allelic  
187 SNPs, sampled by selecting a single SNP from each locus in the "Ingroupmin20" data set (17%  
188 missing data), which includes only ingroup samples and requires that a locus contain data for at  
189 least 20 samples. Ten replicates were run at each value of  $K$  between 2-8. Each run had a burn-in  
190 of 50K generations followed by 500K generations of sampling. Replicates were permuted in the



191 program *CLUMPP* (Jakobsson & Rosenberg 2007), and the optimal  $K$  was inferred using the  
192 online resource *StructureHarvester* (Earl & vonHoldt 2012).

193 We also used the program *Treemix* (v.1.12; Pickrell & Pritchard 2012) to jointly estimate a  
194 tree topology (or graph) with admixture using pooled SNP frequency data. For this, individuals  
195 were pooled into populations matching to species designations except for *Q. fusiformis* which was  
196 split into separate populations for samples from Mexico and Texas. The four non-*Virentes* white  
197 oak samples were pooled as an outgroup population. A single bi-allelic SNP was randomly  
198 sampled from each variable locus that contained data for at least one individual across all  
199 populations, yielding a total of 12,061 bi-allelic SNPs. We inferred a topology without admixture,  
200 as well as when allowing between 1-5 admixture events.

### 201 *Introgression analyses*

202 The four-taxon D-statistic (Durand *et al.* 2011) is a well-known metric for detecting admixture  
203 between diverged lineages based on the frequencies of SNPs that are discordant with a  
204 hypothesized species tree topology. It was most notably used to demonstrate introgression  
205 between Neanderthals and modern humans from full genome data (Green *et al.* 2010), and has  
206 similarly been applied to non-model organisms using RADseq data (The Heliconius Genome  
207 Consortium 2012, Eaton & Ree 2013). Given a four-taxon pectinate tree [(((P1,P2),P3),O)] in  
208 which the outgroup/ancestral allele is labeled “A”, and a derived allele labeled “B”, the D-statistic  
209 compares the occurrence of two discordant site patterns, ABBA and BABA, representing sites in  
210 which an allele is derived in P3 relative to O, and is derived in one but not both of the sister  
211 lineages P1 and P2. These discordant sites can arise through the sorting of ancestral  
212 polymorphisms, but will generally do so with equal frequency due to the stochastic nature of this  
213 process. Alternatively, they may arise if introgression occurs between P3 and either P2 or P1, in  
214 which case one site pattern will occur more frequently than the other. The D-statistic provides a

215 test for historical admixture by calculating asymmetry in the relative occurrence of these two  
216 discordant site patterns:

$$D(P1, P2, P3, O) = \frac{\sum_{i=1}^n C_{ABBA}(i) - C_{BABA}(i)}{\sum_{i=1}^n C_{ABBA}(i) + C_{BABA}(i)} \quad (1)$$

217

218

where  $C_{ABBA}(i)$  and  $C_{BABA}(i)$  are indicator variables of 0 or 1 depending on whether ABBA or BABA is present at each site. Following Durand *et al.* (2011), we used SNP frequencies instead of allele counts in this study to allow for the inclusion of heterozygous sites. Thus,  $D$  was calculated as:

$$D(P1, P2, P3, O) = \frac{\sum_{i=1}^n [(1 - \hat{p}_{i1})\hat{p}_{i2}\hat{p}_{i3}(1 - \hat{p}_{i4}) - \hat{p}_{i1}(1 - \hat{p}_{i2})\hat{p}_{i3}(1 - \hat{p}_{i4})]}{\sum_{i=1}^n [(1 - \hat{p}_{i1})\hat{p}_{i2}\hat{p}_{i3}(1 - \hat{p}_{i4}) + \hat{p}_{i1}(1 - \hat{p}_{i2})\hat{p}_{i3}(1 - \hat{p}_{i4})]} \quad (2)$$

219

220

221 where  $\hat{p}_{i1}$  is the frequency of the derived allele in taxon P1 at site  $i$ . If the sampled individual has  
222 both copies of the derived allele at this site  $\hat{p}_{i1}=1.0$ , if it is heterozygous  $\hat{p}_{i1}=0.5$ , otherwise  
223  $\hat{p}_{i1}=0.0$ . We calculated  $D$  over all combinations of four taxa fitting the maximum likelihood  
224 topology as well as alternative topologies of interest. For ingroup taxa we iterated over each  
225 sampled individual separately, but for the outgroup taxon instead used a pooled group of samples  
226 to measure the SNP frequency. This was made up of the four non-*Virentes* white oak samples,  
227 with  $\hat{p}_{i4}$  calculated as the frequency of derived alleles in all  $2N$  locus copies for  $N$  outgroup  
228 individuals containing data for a given site. This allowed us to maximize the use of RADseq data  
229 with missing sequences, since we could use any locus for which the three sampled ingroup taxa

230 shared data with at least one outgroup. This approach also has the effect of down-weighting  $D$  if  
 231 the ancestral allele is not fixed across multiple outgroup samples, making it a more conservative  
 232 test.

233 For each test we measured the standard deviation of  $D$  from 200 bootstrap replicates in  
 234 which RAD loci were re-sampled with replacement to the same number as in the original data set,  
 235 as in Eaton & Ree (2013). The observed  $D$  was converted to a Z-score measuring the number of  
 236 standard deviations it deviates from 0, and significance was assessed from a P-value using  $\alpha=0.01$   
 237 as a conservative cut-off after Holm-Bonferoni correction for multiple testing (number of possible  
 238 sample combinations fitting the given species tree hypothesis).

239 Partitioned D-statistics (Eaton & Ree 2013) are an extension to this test relevant at deeper  
 240 evolutionary time scales where the P3 lineage may include multiple distinct sub-lineages with  
 241 independent histories of introgression. It measures a five-part allele pattern  
 242 [(((P1,P2),(P3<sub>1</sub>,P3<sub>2</sub>)),O)], and contrasts two P3 sub-lineages at a time by measuring  $D$  for three  
 243 separate pairs of allele counts (ABBBA/BABBA, ABBA/BABAA, and ABABA/BAABA).  
 244 These statistics measure asymmetry in the occurrence of derived alleles present in both P3  
 245 sub-lineages ( $D_{12}$ ), only P3<sub>1</sub> ( $D_1$ ), or only P3<sub>2</sub> ( $D_2$ ), and present in P2 or P1 but not both  
 246 (Fig. 2A).

$$D_1(P1,P2,P3_1,P3_2,O) = \frac{\sum_{i=1}^n C_{ABBAA}(i) - C_{BABAA}(i)}{\sum_{i=1}^n C_{ABBAA}(i) + C_{BABAA}(i)} \quad (3)$$

$$D_2(P1,P2,P3_1,P3_2,O) = \frac{\sum_{i=1}^n C_{ABABA}(i) - C_{BAABA}(i)}{\sum_{i=1}^n C_{ABABA}(i) + C_{BAABA}(i)} \quad (4)$$

$$D_{12}(P1,P2,P3_1,P3_2,O) = \frac{\sum_{i=1}^n C_{ABBBAA}(i) - C_{BABBBAA}(i)}{\sum_{i=1}^n C_{ABBBAA}(i) + C_{BABBBAA}(i)} \quad (5)$$

247 As in the four-taxon tests, we used the four non-*Virentes* white oak samples to represent the  
 248 outgroup, and used a SNP frequency-based version of the test to include data for heterozygous

249 individuals. All D-statistics were measured in pyRAD v.2.13.

250 In contrast to the four-taxon D-statistic, the partitioned test is polarized by defining P3 as a  
251 donor lineage, and P2 or P1 as recipients, which allows  $D_{12}$  to act as an indicator of the direction  
252 of introgression. Briefly, consider a case where introgression occurred in the reverse direction  
253 from how we assign samples to the tips of the tree (e.g., from P2 into P3<sub>1</sub>); in this case, P3<sub>2</sub> would  
254 not contain the same derived alleles that P2 shares with P3<sub>1</sub> through introgression, and thus the  
255 indicator variable  $D_{12}$  would be non-significant, indicating introgression did not occur in this  
256 direction. If we then swap samples across the tips to re-define the P3 lineage, such that  
257 introgression occurred from the defined P3<sub>1</sub> sub-lineage into P2, we would now find that P3<sub>2</sub> also  
258 shares many of the same introgressed alleles that P3<sub>1</sub> shares with P2 (significant  $D_{12}$ ), due to the  
259 fact that many of these alleles arose in the ancestor of the two sampled P3 sub-lineages. In  
260 addition to indicating directionality, partitioning ancestral alleles from those that are derived  
261 uniquely to either P3 sub-lineages also allows us to distinguish whether introgression occurred  
262 from each P3 sub-lineage independently into P1 or P2, or if it occurred from only one (Eaton &  
263 Ree 2013). We apply this test to two separate cases in the live oaks, involving *Q. fusiformis* and  
264 *Q. sagraeana*, in which four-taxon tests show evidence of admixture involving more than two  
265 taxa, to test whether each taxon pair hybridized independently.

266

### *Demographic models*

267 To investigate the origin of the Cuban oak we compared the joint site frequency spectrum (SFS)  
268 generated under three demographic isolation-migration models (Fig. 4A) to that in our observed  
269 data, with a focus on SNPs segregating within and between populations of *Q. oleoides*,  
270 *Q. sagraeana*, and the Florida oaks clade, using the program  $\partial a \partial i$  (Gutenkunst *et al.* 2009). Data  
271 were pooled for the three closely related species in Florida, and the SFS was projected down to  
272 require that every locus contain data for at least five individuals in Florida, three individuals in  
273 *Q. oleoides*, and three individuals in *Q. sagraeana* (projected chromosomes = [10,6,6]). A single

274 bi-allelic SNP was randomly selected from each variable locus, yielding 1,626 SNPs from 7,794  
275 usable loci after data projection.

276 The first two demographic models have 9 parameters and differ only in their topology: in  
277 model 1 the Cuban oak is derived from Florida, while in model 2 it originates from Central  
278 America (Fig. 4A). Model parameters include an effective population size for each population  
279 ( $N_{MGV}$ ,  $N_O$ , and  $N_S$ ) and migration rates between adjacent populations ( $m_{12}$ ,  $m_{21}$ ,  $m_{23}$ ,  $m_{32}$ ). At  
280 time  $T_2$ , two ancestral populations diverge (viewed forward in time), and at time  $T_1$  the Cuban  
281 population diverges from its sister lineage to maintain a separate constant population size. Model  
282 3 has only 7 parameters. In this model,  $T_2$  is again the divergence time for two ancestral  
283 populations, but  $T_1$  is now an event in which an independent Cuban population is formed by an  
284 instantaneous fusion of a proportion ( $f$ ) of the Florida population and  $(1-f)$  of *Q. oleoides*. There  
285 is no further migration between populations.

286 We used the log L-BFGS-B optimization method to fit parameters for each model.  
287 Searches were started from 10 randomly perturbed starting positions, for a maximum of 5  
288 iterations, followed by a final search using the best-inferred parameters from the previous step as  
289 a starting position for a maximum of 20 additional iterations. Extrapolation was performed with a  
290 grid size of [12,20,32]. To attain confidence intervals on parameter estimates we performed  
291 parametric bootstrapping by simulating 200 data sets for each of the three models using the  
292 program *ms* (Hudson 2002). Bootstrap SFS data were simulated under their ML estimated  
293 parameter values and then re-optimized in *∂a∂i* to estimate the parameters that would generate  
294 these data under the same model by which they were generated.

295 The same simulated data sets were also used for Monte Carlo model selection (Boettiger  
296 *et al.* 2012). Here, in addition to fitting the simulated data sets to the model under which they  
297 were simulated, each data set was also fit to the other two models (9 model fits total), and for each  
298 comparison a likelihood ratio [ $\delta = -2(\log L_0 - \log L_1)$ ] was calculated. Larger values for  $\delta$  indicate  
299 more support for model 1 relative to model 0 (the null). Our goal in model selection is to calculate

300 how big  $\delta$  should be in order to decide that model 1 is closer to the truth than model 0 (Boettiger  
301 *et al.* 2012). Power to distinguish models, and the sensitivity of our tests, were assessed from the  
302 overlap in distributions of  $\delta$  values from simulated data, and their comparison to  $\delta$  for our  
303 observed data.

### 304 *Reproducibility*

305 Scripts to download archived sequence data (NCBI: PRJNA277574), assemble it, and reproduce  
306 all analyses in this study are compiled into IPython notebooks (Pérez & Granger 2007), a tool for  
307 reproducible science, available at <https://github.com/dereneaton/virentes> (doi:xxxxyy).

## 308 RESULTS

### 309 *RAD data assembly*

310 Following quality filtering and clustering (85% similarity) 77M raw reads (mean $\pm$ S.D.  
311 2.13M $\pm$ 1.75M per sample) were reduced to an average of 57K $\pm$ 25K high coverage stacks per  
312 sample, with a mean depth of 23X. These were further filtered to 52K $\pm$ 22K consensus sequences  
313 per sample (Table S1). Data sets that were assembled with different minimums for sample  
314 coverage or with samples excluded had different proportions of missing data: The largest but  
315 most incomplete assembled data matrix that includes all loci shared across at least four samples  
316 (Allmin4) has 55.5% missing data for 34 individuals across 78,727 loci, while all other matrices  
317 have fewer missing data (9.6–52.1%; Table 1).

318 The distribution of missing data did not show strong hierarchical structure, as would be  
319 expected if most missing data was caused by locus dropout due to the disruption of restriction  
320 recognition sites (Fig. S1). Instead, for the largest data set (“Allmin4”) the mean number of raw

321 reads was a better predictor for the number of shared loci between samples than was the  
322 phylogenetic distance between samples (Mantel  $r_{\rho}=0.372$ ,  $P=0.010$ , and  $r_{\rho}=-0.145$ ,  $P=0.240$ ,  
323 respectively). A similar result was observed in the more complete “Allmin20” data set (Mantel  
324  $r_{\rho}=0.479$ ,  $P=0.002$ , and  $r_{\rho}=0.087$ ,  $P=0.523$ , respectively), suggesting that sequencing effort had a  
325 more significant impact on missing data than relatedness.

## 326 *Phylogeny*

327 Missing data (the sparseness of concatenated matrices) had little effect on phylogenetic inference  
328 as the larger and more incomplete versions of each data set yielded similar or identical topologies  
329 to the smaller more complete version of that matrix (e.g., Allmin4 & Allmin20; Fig. S2), the latter  
330 often with lower bootstrap supports. All phylogenetic analyses recovered perfect support for three  
331 major clades: a Florida clade (*Q. minima*, *Q. geminata*, and *Q. virginiana*), a southwestern clade  
332 (*Q. brandegeei* and *Q. fusiformis*), and a Central American clade (*Q. oleoides* and *Q. sagraeana*)  
333 (Fig. 1C). Selectively excluding taxa sometimes yielded different relationships within each major  
334 clade, as expected if synapomorphies that are derived from introgression between lineages affect  
335 phylogenetic inference (Eaton & Ree 2013). For example, *Q. fusiformis* appears paraphyletic  
336 with respect to its putative sister taxon *Q. brandegeei* in data sets that include samples from all  
337 three major clades, but monophyly of *Q. fusiformis* is supported when the two other live oak  
338 subclades are excluded (Fig. S2E). A similar pattern is observed for the three Florida clade oaks,  
339 where *Q. virginiana* appears sister to the other two species in full data sets, but *Q. minima* is sister  
340 to the other two species when the southwest and Central American clades are excluded  
341 (Fig. S2G). The phylogenetic instability of *Q. virginiana* and *Q. fusiformis* is consistent with  
342 further evidence below that they have exchanged genes in Texas where they occur in sympatry  
343 and that this affects their phylogenetic placement.

## 344 *Population structure*

345 Population clustering analyses revealed substantial heterogeneity in proportions of admixed  
346 ancestry within and between species. The best supported model ( $K=3$ ) clustered populations into  
347 the same three major clades described above. The three oak species of the Florida clade are  
348 indistinguishable at low values of  $K$  (the number of distinct clusters) (Figs. 1B & S3), and much  
349 of their common ancestry is also shared through apparent admixture with both of their  
350 geographically adjacent taxa: *Q. fusiformis* in Texas to the west and *Q. sagraeana* in Cuba to the  
351 south. *Quercus sagraeana* also shares significant ancestry with *Q. oleoides* from Central  
352 America. In the southwest, *Q. fusiformis* shares ancestry with *Q. brandegeei* and *Q. virginiana*. In  
353 contrast, *Q. oleoides* forms a nearly distinct cluster, except for the sample from Mexico which  
354 shows slight admixture with different groups at different  $K$  values. Only *Q. brandegeei*, endemic  
355 to southern Baja California, forms a distinct non-admixed cluster in all analyses above  $K=2$ ,  
356 suggesting it has remained genetically isolated from all other populations sampled in our study.  
357 Within each species, individuals with the greatest proportions of admixed ancestry appear as the  
358 earliest diverging in their clade (Fig. 1B-C), suggesting that inferred population-level  
359 relationships may reflect admixture proportions to a greater degree than they do historical  
360 population divergences – a major concern for phylogeographic studies below the species level.

361

### *Treemix*

362 *TreeMix* recovered the same topology for population-level relationships as our concatenated ML  
363 analyses performed on individuals. With the addition of one admixture edge, approximately 40%  
364 admixed ancestry is inferred between *Q. sagraeana* and a Florida clade oaks lineage, which also  
365 changes the backbone topology such that *Q. oleoides* is supported as sister to the remaining live  
366 oaks (Fig. S4). Adding a second admixture edge returns a graph similar to that of the original tree  
367 topology, but with admixture between *Q. virginiana* and *Q. sagraeana* (47% ancestry), and  
368 between *Q. virginiana* and *Q. fusiformis* in Texas (24% ancestry). A notable result of the latter  
369 edge is its effect on *Q. brandegeei*, which becomes no longer nested within *Q. fusiformis*. This



370 shows how, despite being completely isolated from admixture itself, introgression occurring into  
371 a close relative of *Q. brandegeei* can still affect its phylogenetic placement.

372         The first admixture edge increases the log-likelihood (LL) by 68.2, the second edge by  
373 60.6, while a third edge increases the LL by only 12.2, and all additional edges by less than 5.  
374 The first two inferred edges are concordant with D-statistic results reported below, and support  
375 admixture between *Q. virginiana* and both *Q. fusiformis* in Texas and *Q. sagraeana* in Cuba. The  
376 third inferred edge (Fig. S4), which shows admixture between the outgroup population and  
377 *Q. minima*, provides only a small improvement to the LL score and is not strongly supported by  
378 D-statistic results.

### 379 *D-statistics*

380 Non-parametric D-statistics (ABBA-BABA tests) revealed substantial heterogeneity in the  
381 presence of admixture within and between species (Table 2). Few tests detected admixture  
382 uniformly across all iterations of sampled individuals. Significant results were largely limited to  
383 samples that occurred in close geographic proximity. For example, among the three sympatric  
384 oaks species in Florida, *Q. virginiana* shares derived alleles with *Q. geminata* to the exclusion of  
385 *Q. minima* when *Q. minima* is sampled from southern Florida, but not when sampled from  
386 northern Florida; an apparent consequence of all three taxa being more homogenized in the north  
387 (tests 1-5, Table 2). *Q. virginiana* is the only species in this clade to occur widely outside of  
388 Florida; however, it shows the same genetic similarity to the other two species in sympatry as it  
389 does in allopatry (tests 6 & 7, Table 2), suggesting that *Q. virginiana* has not received  
390 introgression from either species in the very recent past. Under an alternative topology in which  
391 *Q. minima* is sister to the other two Florida clade live oak species, we detect negligible admixture  
392 between *Q. virginiana* and *Q. geminata*, but admixture of both with the more rare taxon  
393 *Q. minima* (tests 1-4 & 6-8, Table 2). The most admixed sample of *Q. minima* groups with  
394 *Q. geminata* in several phylogenetic analyses (Fig. S2). Both *Q. geminata* and *Q. virginiana* are

395 admixed with *Q. sagraeana* in Cuba, and *Q. virginiana* is also admixed with *Q. fusiformis* in  
396 Texas (tests 16 & 18-22, Table 2). Despite this, the three live oak species in Florida show little  
397 genetic differentiation from each other, and thus for simplicity we refer to them as a single pooled  
398 taxon (called the Florida clade, or abbreviated MGV) in several further analyses.

399         The Cuban oak, *Q. sagraeana*, shows clear admixture with one or more Florida clade  
400 species and with *Q. oleoides* in Central America. Of the three possible rooted topologies for these  
401 three lineages (tests 9-11, Table 2) admixture is greatest when *Q. sagraeana* is sister to the  
402 Florida oaks clade (in conflict with our phylogenetic results) and exchanging genes with  
403 *Q. oleoides*. Here we see that *Q. sagraeana* shares more derived alleles, to the exclusion of the  
404 Florida clade, with the southernmost populations of *Q. oleoides* (Costa Rica & Honduras) than  
405 with northern populations (Mexico & Belize). The alternative test that is concordant with our  
406 phylogenetic results entails less admixture, meaning that *Q. sagraeana* shares more alleles with  
407 *Q. oleoides* than it does with the Florida clade oaks. We suspect that the third possible topology,  
408 in which *Q. sagraeana* diverged first from the other two species is unlikely, since  
409 *Q. sagraeana* exhibits little independent ancestry relative to the other two lineages (Fig. 1B).

410         *Quercus fusiformis*, which ranges from northern Mexico to eastern Texas, shows evidence  
411 of admixture with both of the other two major live oak clades, thus spanning the deepest splits in  
412 the tree. In Mexico it occurs in sympatry with *Q. oleoides*, and the two form a clear  
413 morphological hybrid zone (Cavender-Bares *et al.* In Press). We did not directly sample this  
414 hybrid zone in our genomic data set, however, the most geographically proximate samples from  
415 each taxon show evidence of admixture, suggesting introgression from *Q. oleoides* into  
416 *Q. fusiformis* (tests 12-14 & 23, Table 2). In Texas the range of *Q. fusiformis* overlaps with  
417 *Q. virginiana* and the two appear to have exchanged bi-directional gene flow recently (tests 16 &  
418 22, Table 2), since the divergence of *Q. virginiana* from the other two Florida clade oaks.

#### 419                     *Distinguishing independent introgression events*

420 Reconstructing the history of introgression among lineages does not translate directly from  
421 patterns of shared alleles between them, but instead must be placed in a phylogenetic context. A  
422 clear example of this can be seen with *Q. fusiformis*, which appears admixed with respect to every  
423 other species of live oak save for its sister taxon *Q. brandegeei* (tests 14-17, Table 2). Of its three  
424 potential hybridizing partner lineages it seems least likely to have truly hybridized with  
425 *Q. sagraeana*, which is allopatric in Cuba, compared to the other two lineages with which it  
426 overlaps in Texas or Mexico. By contrasting these lineages as potential donor lineages using  
427 partitioned D-statistics we find that the complex patterns of admixture in *Q. fusiformis* can be  
428 explained by a small number of introgression events. The shared derived alleles between  
429 *Q. sagraeana* and *Q. fusiformis* in Texas are nearly entirely composed of alleles that these two  
430 taxa also share with *Q. virginiana* (Fig. 2B), and similarly, the shared derived alleles between  
431 *Q. sagraeana* and *Q. fusiformis* in Mexico are composed almost entirely of alleles also shared  
432 with *Q. oleoides* (Fig. 2C). Only *Q. virginiana* shares uniquely introgressed alleles with  
433 *Q. fusiformis* in Texas, and only *Q. oleoides* shares uniquely introgressed alleles with  
434 *Q. fusiformis* in Mexico. From this we can infer that introgression occurred separately into  
435 *Q. fusiformis* from these two distinct lineages, but not from their close relative *Q. sagraeana*,  
436 since *Q. sagraeana* does not share introgressed alleles with *Q. fusiformis* to the exclusion of  
437 either of its close relatives.

### 438 *Hidden ancestry and the Cuban oak*

439 That *Q. sagraeana* would share ancestry with both *Q. oleoides* and the Florida clade oaks to the  
440 exclusion of *Q. fusiformis* is consistent with our phylogenetic reconstructions. It is therefore not  
441 surprising that introgression from any one of these three related lineages would introduce shared  
442 ancestral alleles from all three. By a similar logic, we investigated the origins of the Cuban oak by  
443 applying the same test one node lower in the phylogeny – at the first split between a putative  
444 ancestor of *Q. oleoides* and the Florida clade – to test which of these two putative parental

445 lineages shares more ancestral (non-introgressed) alleles with *Q. sagraeana*. Our intention,  
446 therefore, was to detect evidence of a putative most recent common ancestor (MRCA) whose  
447 historical signature has become obscured, by finding evidence of their shared ancestry in alleles  
448 that are introgressed from one or more of their descendant lineages into another.

449 We compared two competing hypotheses: (1) *Q. sagraeana* shares a MRCA with  
450 *Q. oleoides* from Central America but subsequently exchanged alleles with one or more Florida  
451 clade oaks; or (2) *Q. sagraeana* shares a MRCA with (or within) the Florida clade oaks but  
452 subsequently exchanged genes with *Q. oleoides* (Fig. 3). Both scenarios assume that the ancestral  
453 lineage established on Cuba through seed and that later introgression occurred infrequently, either  
454 through rare long distance dispersal events or wind-dispersed pollen, most likely at times of low  
455 sea level when distances between Cuba and the mainland were reduced.

456 Partitioning shared versus uniquely derived alleles among these three lineages reveals  
457 strong support for the Central American origin hypothesis. If we begin by assuming  
458 *Q. oleoides* and *Q. sagraeana* are sister species, we find that *Q. sagraeana* shares a set of  
459 uniquely derived alleles with *Q. virginiana* (relative to *Q. minima*; significant  $D_1$ ), and that a set  
460 of derived alleles which putatively arose in the ancestor of *Q. oleoides* and *Q. sagraeana* is also  
461 shared with *Q. virginiana* (significant  $D_{12}$ ), but *Q. oleoides* itself does not share a set of uniquely  
462 derived alleles with *Q. virginiana* (non-significant  $D_2$ ) (Fig. 3A; tests 26-31, Table S2). This  
463 pattern is consistent with a topology in which *Q. oleoides* and *Q. sagraeana* share a MRCA but  
464 introgression occurred from only one descendant lineage. It follows then that if this topology  
465 were true all populations of *Q. oleoides* should also share with *Q. virginiana* the set of alleles that  
466 arose in the ancestor of *Q. oleoides* and *Q. sagraeana*, despite the fact that *Q. oleoides* never  
467 hybridized with *Q. virginiana* directly (they are allopatric). This is precisely what we find  
468 (Fig. 3B; tests 32-37, Table S2): shared alleles between *Q. oleoides* populations are present in  
469 *Q. virginiana*, but no single *Q. oleoides* population shows significantly greater genetic similarity  
470 with *Q. virginiana*. While this result supports our hypothesized scenario, the true history of

471 divergence and gene flow may be more complex; for example, introgression appears to have also  
472 occurred in the reverse direction, from Florida into Cuba, and most likely more than once, since  
473 both *Q. virginiana* and *Q. geminata* share a different set of uniquely introgressed alleles with  
474 *Q. sagraeana* (Fig. 3C; tests 38-43, Table S2) relative to *Q. oleoides*.

475 The alternative scenario, in which *Q. sagraeana* is derived from the Florida clade, yields  
476 patterns of admixture that are less consistent with the existence of a hypothetical MRCA. This is  
477 apparent first in the overabundance of uniquely shared alleles between *Q. sagraeana* and  
478 *Q. oleoides* ( $D_1$ ), relative to ancestral alleles that should be derived from the hypothetical MRCA  
479 of *Q. sagraeana* and *Q. virginiana* (Fig. 3D; tests 44-47, Table S2). It is further apparent because  
480 the putative introgression between *Q. sagraeana* and *Q. oleoides* did not introduce any alleles  
481 from *Q. virginiana*, or its other Florida clade relatives, which are expected to be introduced  
482 alongside alleles from *Q. sagraeana* if they shared a MRCA, and if either acted as an introgressive  
483 donor (Fig. 3E; tests 48-53, Table S2). Thus, the strong signal of apparent introgression between  
484 *Q. sagraeana* and *Q. oleoides* (Fig. 3F; tests 54-57, Table S2) is most likely, rather, a signal of  
485 their shared ancestry made apparent by testing for introgression on an incorrect species tree.

486

### *Demographic models*

487 We further compared these two hypotheses with a third model in which the Cuban population was  
488 formed by instantaneous admixture from two parent lineages but remained completely isolated  
489 thereafter (Fig. 4A) – a scenario akin to hybrid speciation. By fitting the SFS for these three  
490 lineages to demographic models in  $\partial a \partial i$  (Gutenkunst *et al.* 2009), we found greatest support for a  
491 Central American origin (LL=-541.9), followed by the Florida origin (LL=-543.1) and hybrid  
492 origin (LL=-555.3) models. The least parameter rich model (hybrid origin) is easily rejected in  
493 favor of the two more complex models: the difference in log-likelihood ( $\delta$ ) between models was  
494 greater in our observed data than in all simulated data sets generated under the hybrid origin  
495 scenario (Fig. 4B). This test was also very sensitive: at a false positive rate of 5%, we had >99%

496 power to reject the hybrid origin model. There is no clear null when comparing the remaining two  
497 models to each other, as they are non-nested, and equal in number of parameters. Thus a P-value  
498 of 5% may be considered overly stringent (Boettiger *et al.* 2012). The observed  $\delta$  supporting a  
499 Central American origin is greater than 93% of simulations generated under the Florida origin  
500 model (P=0.07), and using this as our test statistic, we have 92% power to reject a Florida origin  
501 if the other model were true. Or, if we use the traditional cutoff of 5%, we have 85% power to  
502 correctly distinguish the models (Fig. 4B). Using  $2.5 \times 10^{-9}$  as the average mutation rate per site  
503 per generation (inferred from *Populus* (Tuskan *et al.* 2006)), and an average generation time of 30  
504 years, our best model (Central American origin) infers a crown age for these three lineages of  
505 1.75 (1.19–4.00) Mya, with divergence of *Q. sagraeana* occurring 0.19 (0.04-0.31) Mya  
506 (Table 3). Introgression occurred predominately into *Q. sagraeana* from the Florida clade, and to  
507 a lesser extent from *Q. oleoides*.

## 508 DISCUSSION

509 Introgressive hybridization is commonly studied at the scale of individual species pairs (Petit  
510 *et al.* 1997), among multiple sympatric species (Whittemore & Schaal 1991), or in a sampling of  
511 close relatives (The Heliconius Genome Consortium 2012, Gugger & Cavender-Bares 2013, Kane  
512 *et al.* 2009, Nadeau *et al.* 2013), but rarely in the context of all extant species within an  
513 ecologically and evolutionarily distinct clade. Here, by sampling all relevant populations and  
514 comparing them in a phylogenetic context we were able to reconstruct a clade-level history of  
515 introgression, and to correct many potentially misleading signals of admixture. We find that every  
516 pair of species occurring in close geographic proximity has exchanged some amount of gene flow,  
517 with no evidence of introgression that is not concordant with species present day geographic  
518 distributions. This suggests that geographic ranges of the live oaks, at least relative to each other,  
519 have likely remained stable through time. Such stasis is consistent with the fact that live oak  
520 species exhibit substantial differences in adaptations to climatic niche, particularly with regard to

521 drought and freezing tolerances (Cavender-Bares *et al.* 2011, Cavender-Bares & Pahlich 2009,  
522 Koehler *et al.* 2012, Ramirez-Valiente *et al.* In Press, Cavender-Bares *et al.* In Press). Together  
523 they span a nearly continuous range from temperate, to dry desert, and even tropical climates. A  
524 classic hypothesis for limits on the spread of introgressed alleles between species is that such  
525 alleles may facilitate adaptations to intermediate environments within hybrid zones, but decrease  
526 fitness elsewhere (Barton & Hewitt 1985). In the live oaks, genetic exchange is theoretically  
527 possible throughout a ring-like complex composing up to six interconnected, interfertile species  
528 that effectively encircle the Gulf of Mexico, including a connection through Cuba. However,  
529 introgressed alleles appear to remain largely concentrated in hybrid zones.

### 530 *The comparative nature of tests for introgression*

531 Our analyses demonstrate the difficulty of inferring historical introgression over deep  
532 evolutionary time scales. In particular, that sparse sampling can lead to false inferences of  
533 hybridization when the source of introgressed alleles is unknown, or stems from multiple sources,  
534 as is common for oaks. This is the case for *Q. fusiformis*, which has experienced introgression  
535 with two divergent lineages in opposite ends of its geographic range. Because the two lineages  
536 with which it hybridized share a common ancestor since their divergence from *Q. fusiformis* each  
537 introduced many of the same alleles into it. They also introduced alleles that they share with their  
538 other close relatives, including *Q. sagraeana*. Had we failed to sample all extant species, and thus  
539 been unable to contrast their patterns of shared versus uniquely derived alleles, we could have  
540 easily been misled as to the source of introgression. For example, consider if *Q. oleoides* had not  
541 been sampled, in which case only *Q. sagraeana* would appear to share uniquely introgressed  
542 alleles with *Q. fusiformis* in the southern part of its range (Fig. 2C); and similarly, a failure to  
543 sample the Florida oak clade would lead us to infer introgression from *Q. sagraeana* into  
544 *Q. fusiformis* in the northern part of its range (Fig 2B). Given that the true result in each of these  
545 cases was that introgression occurred from the most geographically proximate taxon such a

546 distinction may seem trivial. However, if we consider that many studies of introgression focus on  
547 only a single species pair, the potential for error, especially in highly diverse clades, is clear. The  
548 ability to accurately reconstruct a history of hybridization among multiple closely related species  
549 from genomic data would provide an invaluable tool for the study of speciation and reproductive  
550 isolation (Rabosky & Matute 2013). The case of the American live oaks makes clear that such  
551 histories can be highly complex, and teasing them apart requires both fine-scale sampling and  
552 careful hypothesis testing.

### 553 *Inferring admixture*

554 We explored a range of methods for detecting introgression and admixture, all of which returned  
555 complementary results. *Structure* and *TreeMix* share similarities in their underlying parametric  
556 models that infer admixture from the distribution of allele frequencies among populations  
557 (Pritchard *et al.* 2000); in the latter case, modeling changes along the branches of a phylogeny (or  
558 network) according to genetic drift (Pickrell & Pritchard 2012). The *TreeMix* approach is  
559 advantageous over D-statistics in that it takes into account the full phylogeny when inferring  
560 admixture, as opposed to individual four or five-taxon subsets of the tree. It thus identifies  
561 introgression in the context of all competing hypotheses, and takes into account the  
562 non-independence of introgression events. However, when applied to deeply divergent lineages,  
563 as in our data, several assumptions of the model may be violated, such as equal population sizes,  
564 and that allelic variation arises from ancestral polymorphisms rather than *de novo* mutations  
565 (Pickrell & Pritchard 2012). When allowing more than two admixture edges in the live oaks,  
566 *TreeMix* inferred one or more instances of introgression between *Q. minima* and the outgroup  
567 “population” (tested as various combinations of the four non-*Virentes* white oak taxa), which we  
568 suspect is a false result: it is not supported by D-statistics using red oaks as a more distant  
569 outgroup [range  $Z=(0.25-1.99)$ ]. The simplified assumptions underlying non-parametric  
570 D-statistics may better facilitate their application for hypothesis testing over deeper evolutionary



571 time scales, however, care must be taken in interpreting results within the context of unsampled  
572 phylogenetic relationships.

### 573 *Hybrid species*

574 We have focused on reconstructing phylogeny as a representation of the divergence of species  
575 through time, assuming that species have remained cohesive lineages despite instances of  
576 introgression between them. This view differs from the use of a graph or network to represent  
577 truly reticulate histories, or similarly, describing admixed lineages as having arisen through  
578 hybrid speciation (Schumer *et al.* 2014). For the latter case, we explicitly tested a model of  
579 instantaneous hybrid speciation for the origin of *Q. sagraeana*, the most admixed lineage in the  
580 American live oaks. This model was a poor fit compared to one in which an ancestral population  
581 of *Q. oleoides* colonized the island and received persistent low levels of introgression from one or  
582 more oak species in Florida. A similar scenario in which an island population has undergone  
583 nuclear “conversion” towards the genomic makeup of another species has been described for  
584 ABC Island brown bears off the coast of Alaska (Cahill *et al.* 2013). Numerous examples of  
585 nuclear-chloroplast discordance in mainland oak species suggest this may be a common  
586 phenomenon (Petit *et al.* 2004), perhaps exacerbated by limited seed dispersal but widespread  
587 pollen flow in oaks.

### 588 *Introgression and phylogeny*

589 The effects of introgression on phylogenetic inference are often difficult to detect, but is made  
590 easier when multiple individuals are sampled from within a species that vary in their proportions  
591 of admixed ancestry. The rare and isolated taxon *Q. brandegeei*, from Baja California, provides  
592 an interesting example. Phylogenetic analyses suggested that it is nested within *Q. fusiformis*,  
593 appearing more closely related to populations from Mexico than from Texas. This finding, it turns

594 out, is not a result of increased similarity between *Q. brandegeei* and *Q. fusiformis* (Mexico), but  
595 rather from the decreased relatedness between *Q. brandegeei* and *Q. fusiformis* (Texas); the latter  
596 arising from introgression that occurred into *Q. fusiformis* (Texas) from a more distant clade. This  
597 is clear from the phylogenetic results of censored data sets excluding the introgressive donor,  
598 which recovered strong support for monophyly of *Q. fusiformis* and its sister relationship to  
599 *Q. brandegeei* (Fig. S2E). Should we interpret this to mean that *Q. fusiformis* is not truly  
600 paraphyletic with respect to *Q. brandegeei*? The answer depends on what we wish our phylogeny  
601 to represent. If it is the historical pattern of population splitting, then *Q. brandegeei* clearly does  
602 not belong nested within *Q. fusiformis*. If the phylogeny is meant to show the genetic similarity of  
603 sampled individuals, then paraphyly of *Q. fusiformis*, which was recovered in most of our  
604 analyses, may be the most appropriate representation.

### 605 *The nature of oak species*

606 The nature of species boundaries in oaks is a long-standing topic of philosophical debate. Burger  
607 (1975) and later Van Valen (1976) envisioned oaks as a form of “ecological species” in which  
608 populations filling a unique ecological niche remain recognizably distinct through shared  
609 adaptations regardless of their genomic makeup. Their classic example involves the widespread  
610 and easily recognizable bur oak (*Q. macrocarpa*), which hybridizes with up to seven other species  
611 across its range. Van Valen conjectured that it does not matter whether a bur oak population in  
612 Quebec is more likely to exchange genes with its local congener than with another bur oak  
613 population in Texas. He argued that if a recognizably distinct ecological unit persists across this  
614 range, it is sufficient to define the species. In the context of more recent views on ecological  
615 speciation (Nosil 2012), and the porous nature of species boundaries (Harrison & Larson 2014),  
616 the “ecological species” remains relevant, but with an elevated role for genetics – albeit  
617 sometimes very few genes (Wu 2001). Our analyses suggest that despite the near continuous

618 geographic distribution of the live oaks, and extensive introgression, species tend to form distinct  
619 ecological units that have been maintained over evolutionary time scales.

620 *Acknowledgments*

621 We thank R. Ree, Y. Brandvain, and the Donoghue Lab at Yale for helpful discussions. This work  
622 was partially supported by National Science Foundation grants IOS-0843665 (to J.C-B),  
623 DEB-1146380 (to J.C-B & A.R-G), DEB-1146488 (to A.H), and a Lester Armour Graduate  
624 Student Fellowship at the Field Museum (to D.E).

625 \*

626 *References*

627 Avise, J.C. (2000). *Phylogeography: The History and Formation of Species*. Harvard University  
628 Press.

629 Baird, N.A. *et al.* (2008). Rapid SNP discovery and genetic mapping using sequenced RAD  
630 markers. *PLoS ONE*, 3, e3376.

631 Barton, N.H. & Hewitt, G.M. (1985). Analysis of hybrid zones. *Annual Review of Ecology and*  
632 *Systematics*, 16, 113–148.

633 Boettiger, C., Coop, G. & Ralph, P. (2012). Is your phylogeny informative? measuring the power  
634 of comparative methods. *Evolution*, 66, 2240–2251.

635 Borgardt, S.J. & Pigg, K.B. (1999). Anatomical and developmental study of petrified *Quercus*  
636 (Fagaceae) fruits from the middle Miocene, Yakima Canyon, Washington, USA. *American*  
637 *Journal of Botany*, 86, 307–325.

638 Burger, W.C. (1975). The species concept in *Quercus*. *Taxon*, 24, 45–50.

- 639 Cahill, J.A. *et al.* (2013). Genomic evidence for island population conversion resolves conflicting  
640 theories of polar bear evolution. *PLoS Genetics*, 9, e1003345.
- 641 Cavender-Bares, J., Gonzalez-Rodriguez, A., Eaton, D., Hipp, A., Beulke, A. & Manos, P. (In  
642 Press). Phylogeny and biogeography of the American live oaks (*Quercus* subsection *Virentes*):  
643 A genomic and population genetic approach. *Molecular Ecology*.
- 644 Cavender-Bares, J., Gonzalez-Rodriguez, A., Pahlich, A., Koehler, K. & Deacon, N. (2011).  
645 Phylogeography and climatic niche evolution in live oaks (*Quercus* series *Virentes*) from the  
646 tropics to the temperate zone. *Journal of Biogeography*, 38, 962–981.
- 647 Cavender-Bares, J. & Pahlich, A. (2009). Molecular, morphological, and ecological niche  
648 differentiation of sympatric sister oak species, *Quercus virginiana* and *Q. geminata* (Fagaceae).  
649 *American Journal of Botany*, 96, 1690–1702.
- 650 Coyne, J.A. & Orr, H.A. (2004). *Speciation*. W.H. Freeman.
- 651 Dumolin-Lapegue, S., Kremer, A. & Petit, R.J. (1999). Are chloroplast and mitochondrial DNA  
652 variation species independent in oaks? *Evolution*, 53, 1406–1413.
- 653 Durand, E.Y., Patterson, N., Reich, D. & Slatkin, M. (2011). Testing for ancient admixture  
654 between closely related populations. *Molecular Biology and Evolution*, 28, 2239–2252.
- 655 Earl, D.A. & vonHoldt, B.M. (2012). STRUCTURE HARVESTER: a website and program for  
656 visualizing STRUCTURE output and implementing the Evanno method. *Conservation*  
657 *Genetics Resources*, 4, 359–361.
- 658 Eaton, D.A.R. (2014). PyRAD: assembly of de novo RADseq loci for phylogenetic analyses.  
659 *Bioinformatics*, 30, 1844–1849.

- 660 Eaton, D.A.R. & Ree, R.H. (2013). Inferring phylogeny and introgression using RADseq data:  
661 An example from flowering plants (Pedicularis: Orobanchaceae). *Systematic Biology*, 62,  
662 689–706.
- 663 Green, R.E., Krause, J., Briggs, A.W., Maricic, T., Stenzel, U., Kircher, M., Patterson, N., Li, H.,  
664 Zhai, W., Fritz, M.H.Y., Hansen, N.F., Durand, E.Y., Malaspinas, A.S., Jensen, J.D.,  
665 Marques-Bonet, T., Alkan, C., Prüfer, K., Meyer, M., Burbano, H.A., Good, J.M., Schultz, R.,  
666 Aximu-Petri, A., Butthof, A., Höber, B., Höffner, B., Siegemund, M., Weihmann, A.,  
667 Nusbaum, C., Lander, E.S., Russ, C., Novod, N., Affourtit, J., Egholm, M., Verna, C., Rudan,  
668 P., Brajkovic, D., Kucan, v., Gu, I., Doronichev, V.B., Golovanova, L.V., Lalueza-Fox, C.,  
669 Rasilla, M.d.l., Fortea, J., Rosas, A., Schmitz, R.W., Johnson, P.L.F., Eichler, E.E., Falush, D.,  
670 Birney, E., Mullikin, J.C., Slatkin, M., Nielsen, R., Kelso, J., Lachmann, M., Reich, D. &  
671 Pääbo, S. (2010). A draft sequence of the Neandertal genome. *Science*, 328, 710–722.
- 672 Gugger, P.F. & Cavender-Bares, J. (2013). Molecular and morphological support for a Florida  
673 origin of the Cuban oak. *Journal of Biogeography*, 40, 632–645.
- 674 Gutenkunst, R.N., Hernandez, R.D., Williamson, S.H. & Bustamante, C.D. (2009). Inferring the  
675 joint demographic history of multiple populations from multidimensional SNP frequency data.  
676 *PLoS Genetics*, 5, e1000695.
- 677 Hardin, J.W. (1975). Hybridization and introgression in *Quercus alba*. *Journal of the Arnold*  
678 *Arboretum*, 56, 336–363.
- 679 Harrison, R.G. & Larson, E.L. (2014). Hybridization, introgression, and the nature of species  
680 boundaries. *Journal of Heredity*, 105, 795–809.
- 681 Hipp, A.L., Eaton, D.A.R., Cavender-Bares, J., Fitzek, E., Nipper, R. & Manos, P.S. (2014). A  
682 framework phylogeny of the American oak clade based on sequenced RAD data. *PLoS ONE*,  
683 9, e93975.

- 684 Hudson, R.R. (2002). Generating samples under a Wright-Fisher neutral model of genetic  
685 variation. *Bioinformatics*, 18, 337–338.
- 686 Jakobsson, M. & Rosenberg, N.A. (2007). CLUMPP: a cluster matching and permutation  
687 program for dealing with label switching and multimodality in analysis of population structure.  
688 *Bioinformatics*, 23, 1801–1806.
- 689 Kane, N.C., King, M.G., Barker, M.S., Raduski, A., Karrenberg, S., Yatabe, Y., Knapp, S.J. &  
690 Rieseberg, L.H. (2009). Comparative genomic and population genetic analyses indicate highly  
691 porous genomes and high levels of gene flow between divergent *Helianthus* species. *Evolution*,  
692 63, 2061–2075.
- 693 Koehler, K., Center, A. & Cavender-Bares, J. (2012). Evidence for a freezing tolerance-growth  
694 rate trade-off in the live oaks (*Quercus* series *Virentes*) across the tropical-temperate divide.  
695 *The New Phytologist*, 193, 730–744.
- 696 Kurz, H. & Godfrey, R.K. (1962). *Trees of Northern Florida*. University of Florida Press.
- 697 Leaché, A.D., Harris, R.B., Rannala, B. & Yang, Z. (2014). The influence of gene flow on species  
698 tree estimation: a simulation study. *Systematic Biology*, 63, 17–30.
- 699 Maddison, W.P. & Knowles, L.L. (2006). Inferring phylogeny despite incomplete lineage sorting.  
700 *Systematic Biology*, 55, 21–30.
- 701 Muller, C.H. (1961). The live oaks of the series *Virentes*. *American Midland Naturalist*, 65,  
702 17–39.
- 703 Nadeau, N.J. *et al.* (2013). Genome-wide patterns of divergence and gene flow across a butterfly  
704 radiation. *Molecular Ecology*, 22, 814–826.
- 705 Nixon, K. & Muller, C. (1997). *Quercus* Linnaeus sect. *Quercus* white oaks. In: *Flora of North*  
706 *America North of Mexico*. Oxford University Press, New York, pp. 436–506.

- 707 Nixon, K.C. (1984). *A biosystematic study of Quercus series Virentes (the live oaks) with*  
708 *phylogenetic analyses of Fagales, Fagaceae and Quercus*. Ph.D. thesis, University of Texas.
- 709 Nosil, P. (2012). *Ecological Speciation*. Oxford University Press, Oxford; New York.
- 710 Pearse, I.S. & Hipp, A.L. (2009). Phylogenetic and trait similarity to a native species predict  
711 herbivory on non-native oaks. *Proceedings of the National Academy of Sciences*, 106,  
712 18097–18102.
- 713 Pérez, F. & Granger, B.E. (2007). IPython: a system for interactive scientific computing.  
714 *Computing in Science and Engineering*, 9, 21–29.
- 715 Petit, R.J., Bodénès, C., Ducouso, A., Roussel, G. & Kremer, A. (2004). Hybridization as a  
716 mechanism of invasion in oaks. *New Phytologist*, 161, 151–164.
- 717 Petit, R.J. & Excoffier, L. (2009). Gene flow and species delimitation. *Trends in Ecology &*  
718 *Evolution*, 24, 386–393.
- 719 Petit, R.J. *et al.* (1997). Chloroplast DNA footprints of postglacial recolonization by oaks.  
720 *Proceedings of the National Academy of Sciences*, 94, 9996–10001.
- 721 Pickrell, J.K. & Pritchard, J.K. (2012). Inference of population splits and mixtures from  
722 genome-wide allele frequency data. *PLoS Genetics*, 8, e1002967.
- 723 Pritchard, J.K., Stephens, M. & Donnelly, P. (2000). Inference of population structure using  
724 multilocus genotype data. *Genetics*, 155, 945–959.
- 725 Rabosky, D.L. & Matute, D.R. (2013). Macroevolutionary speciation rates are decoupled from  
726 the evolution of intrinsic reproductive isolation in *Drosophila* and birds. *Proceedings of the*  
727 *National Academy of Sciences*, 110, 15354–15359.

- 728 Ramirez-Valiente, J., Koehler, K. & Cavender-Bares, J. (In Press). Inter- and intraspecific  
729 variation in xanthophyll cycle pigments and anthocyanin accumulation in response to drought  
730 and low temperature in live oaks (*Quercus* series *Virentes*). *New Phytologist*.
- 731 Rhymer, J.M. & Simberloff, D. (1996). Extinction by hybridization and introgression. *Annual*  
732 *Review of Ecology and Systematics*, 27, 83–109.
- 733 Rogers, A.R. & Bohlender, R.J. (In Press). Bias in estimators of archaic admixture. *Theoretical*  
734 *Population Biology*.
- 735 Schumer, M., Rosenthal, G.G. & Andolfatto, P. (2014). How common is homoploid hybrid  
736 speciation? *Evolution*, 68, 1553–1560.
- 737 Stamatakis, A. (2014). RAxML version 8: a tool for phylogenetic analysis and post-analysis of  
738 large phylogenies. *Bioinformatics*, 30, 1312–1313.
- 739 The Heliconius Genome Consortium (2012). Butterfly genome reveals promiscuous exchange of  
740 mimicry adaptations among species. *Nature*, 487, 94–98.
- 741 Tuskan, G.A. *et al.* (2006). The genome of black cottonwood, *Populus trichocarpa* (Torr. &  
742 Gray). *Science*, 313, 1596–1604.
- 743 Van Valen, L. (1976). Ecological species, multispecies, and oaks. *Taxon*, 25, 233–239.
- 744 Whittmore, A.T. & Schaal, B.A. (1991). Interspecific gene flow in sympatric oaks. *Proceedings*  
745 *of the National Academy of Sciences of the United States of America*, 88, 2540–2544.
- 746 Wu, C.I. (2001). The genic view of the process of speciation. *Journal of Evolutionary Biology*,  
747 14, 851–865.



Table 1: Size, completeness, and the number of phylogenetic informative sites (PIS) in 15 assembled RADseq data sets.

| Data set     | N samples | N loci | PIS    | % Missing |
|--------------|-----------|--------|--------|-----------|
| Allmin4      | 34        | 78727  | 251986 | 55.47     |
| Allmin20     | 34        | 27369  | 110500 | 26.59     |
| Ingroupmin20 | 27        | 15123  | 29957  | 16.99     |
| MGVmin4      | 19        | 72849  | 207713 | 46.72     |
| MGVmin16     | 19        | 9464   | 33829  | 12.09     |
| OSmin4       | 15        | 68453  | 182896 | 42.22     |
| OSmin13      | 15        | 10845  | 36983  | 9.67      |
| FBmin4       | 14        | 69205  | 187949 | 39.44     |
| FBmin12      | 14        | 14980  | 51850  | 9.60      |
| OSMGVmin4    | 27        | 76839  | 235345 | 52.11     |
| OSMGVmin20   | 27        | 15904  | 60873  | 18.61     |
| FBMGVmin4    | 26        | 77523  | 239513 | 50.93     |
| FBMGVmin20   | 26        | 14925  | 57923  | 16.66     |
| FBOSmin4     | 22        | 76379  | 230366 | 47.63     |
| FBOSmin20    | 22        | 21905  | 83516  | 17.84     |

Table 2: Four-taxon D-statistic tests for admixture. Taxon names are abbreviated as in Fig. 1 and arranged such that ABBA>BABA. Outgroups not shown.

| Test | P1    | P2 | P3       | range $Z^a$         | nSig/N <sup>b</sup> |
|------|-------|----|----------|---------------------|---------------------|
| 1    | G     | G  | M        | (0.0, 2.3)          | 0/23                |
| 2    | M     | M  | G        | (1.3, <b>6.8</b> )  | 12/23               |
| 3    | G     | G  | V        | (0.2, 2.4)          | 0/17                |
| 4    | M     | M  | V        | (0.2, <b>4.7</b> )  | 7/17                |
| 5    | M     | G  | V        | (0.1, <b>7.9</b> )  | 28/47               |
| 6    | V     | V  | M        | (0.0, 1.6)          | 0/11                |
| 7    | V     | V  | G        | (0.1, 2.5)          | 0/11                |
| 8    | V     | G  | M        | (0.0, <b>3.9</b> )  | 1/11                |
| 9    | O     | S  | (MGV)    | <b>(3.1, 16.2)</b>  | 164/164             |
| 10   | (MGV) | S  | O        | <b>(14.7, 36.4)</b> | 164/164             |
| 11   | (MGV) | O  | S        | <b>(6.8, 25.8)</b>  | 164/164             |
| 12   | O     | O  | F        | (0.0, 1.6)          | 0/39                |
| 13   | O     | O  | B        | (0.1, 2.4)          | 0/29                |
| 14   | B     | F  | O        | (0.0, <b>8.1</b> )  | 29/59               |
| 15   | B     | F  | S        | (0.9, <b>8.1</b> )  | 30/35               |
| 16   | B     | F  | (MGV)    | (1.3, <b>17.9</b> ) | 119/131             |
| 17   | B     | B  | F        | (0.2, 2.6)          | 0/11                |
| 18   | S     | S  | (MGV)    | (0.0, <b>4.1</b> )  | 2/32                |
| 19   | M     | V  | S        | (1.1, <b>7.1</b> )  | 17/35               |
| 20   | M     | G  | S        | (0.0, <b>6.9</b> )  | 18/47               |
| 21   | V     | G  | S        | (0.0, 2.9)          | 0/35                |
| 22   | (MG)  | V  | $F_{TX}$ | <b>(3.6, 10.6)</b>  | 47/47               |
| 23   | O     | O  | $F_{MX}$ | (0.0, 1.7)          | 0/19                |
| 24   | S     | S  | O        | (0.0, <b>4.1</b> )  | 2/14                |
| 25   | O     | O  | S        | (0.1, <b>7.3</b> )  | 10/29               |

<sup>a</sup> Bold indicates significance at  $\alpha=0.01$ .

<sup>b</sup> Significant tests over possible sampled individuals.

Table 3: Maximum likelihood (ML) parameter estimates and 95% confidence intervals (CI) for three demographic models for the origin of the Cuban oak.

| Parameter                     | Model 1 (Florida origin) |              | Model 2 (CA origin) |              | Model 3 (Hybrid origin) |              |
|-------------------------------|--------------------------|--------------|---------------------|--------------|-------------------------|--------------|
|                               | ML                       | 95% CI       | ML                  | 95% CI       | ML                      | 95% CI       |
| $N_{MGV}$ ( $\times 10^3$ )   | 89.04                    | 71.48–100.27 | 88.34               | 69.72–100.02 | 90.89                   | 70.39–104.80 |
| $N_O$ ( $\times 10^3$ )       | 24.52                    | 18.59–29.47  | 24.19               | 17.82–29.34  | 28.89                   | 22.63–33.64  |
| $N_S$ ( $\times 10^3$ )       | 2.73                     | 0.00–5.30    | 8.44                | 2.38–13.46   | 5.76                    | 0.34–10.70   |
| $T_{12}$ (Mya)                | 1.83                     | 1.43–4.00    | 1.75                | 1.19–4.00    | 1.46                    | 0.81–3.54    |
| $T_1$ (Mya)                   | 0.32                     | 0.00–0.90    | 0.19                | 0.04–0.31    | 0.06                    | 0.00–0.11    |
| $m_{MGV-S}$ ( $\times 10^3$ ) | 0.00                     | 0.00–0.01    | 0.00                | 0.00–0.00    | —                       | —            |
| $m_{S-MGV}$ ( $\times 10^3$ ) | 0.18                     | 0.02–0.34    | 0.08                | 0.01–0.09    | —                       | —            |
| $m_{S-O}$ ( $\times 10^3$ )   | 0.02                     | 0.00–0.03    | 0.06                | 0.02–0.09    | —                       | —            |
| $m_{O-S}$ ( $\times 10^3$ )   | 0.30                     | 0.02–0.52    | 0.00                | 0.00–0.00    | —                       | —            |
| $f_{MGV}$                     | —                        | —            | —                   | —            | 0.38                    | 0.34–0.42    |

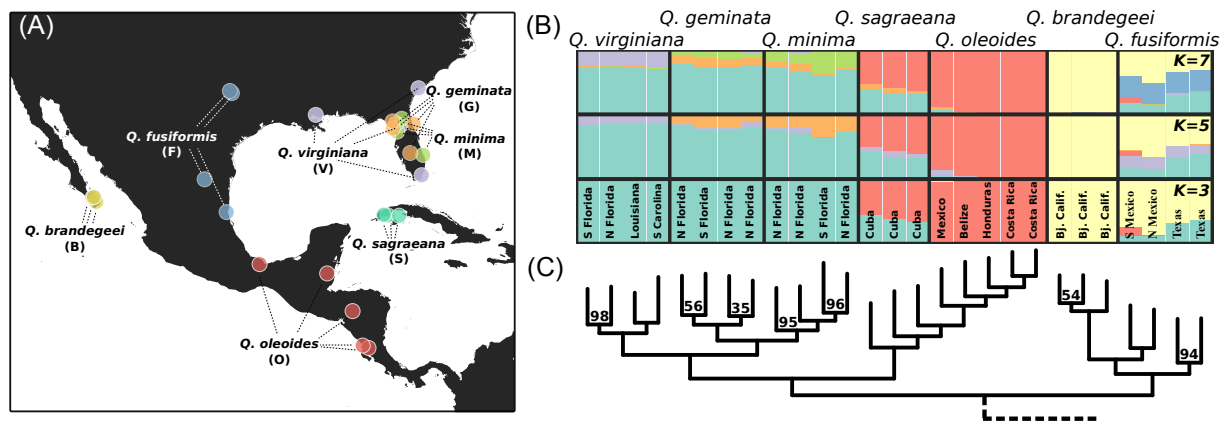

Figure 1: Sampling locations spanning the geographic ranges of each of the seven live oak taxa. (B) Population clustering inferred with admixture at three values of  $K$ . Sampling locations are indicated. (C) Rooted ML phylogeny inferred from the largest (Allmin4) concatenated RADseq data set. Only ingroup taxa are shown. Bootstrap support is 100 except where indicated.

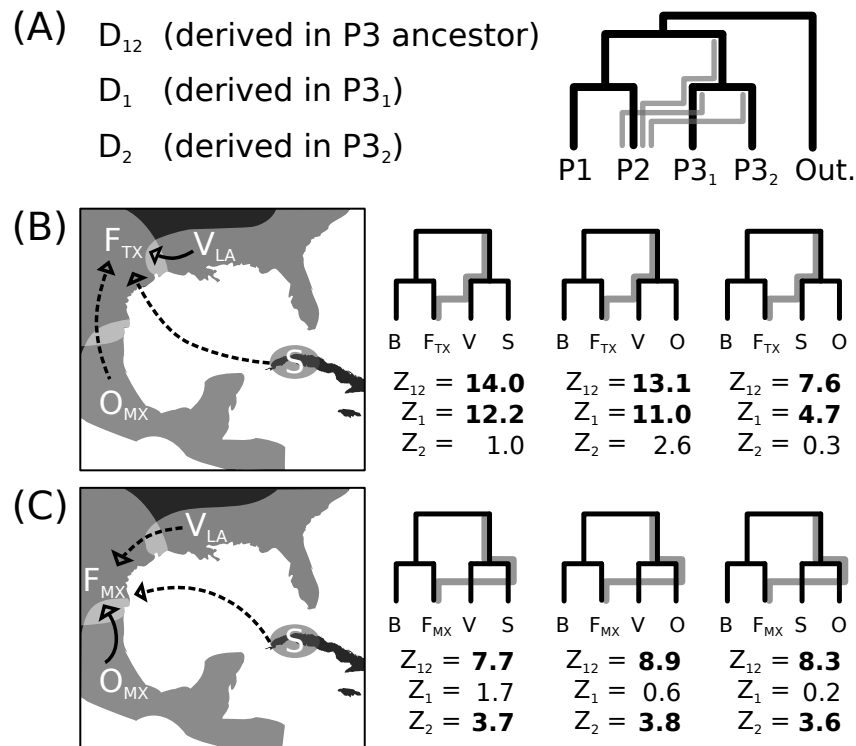

Figure 2: Teasing apart non-independent signals of admixture. (A) Partitioned D-statistics test for directional introgression from the P3 lineage into P2 or P1 and contrast P3 sub-lineages as introgressive donors. Results are reported as Z-scores. (B) Three closely related lineages (S, V & O; taxon names abbreviated as in Fig. 1) each share alleles with F in Texas to the exclusion of B (significant  $D_{12}$ ), but when contrasted against each other ( $D_1$  and  $D_2$ ) only V shares uniquely introgressed alleles with  $F_{TX}$  relative to the other two P3 sub-lineages. (C) A similar test examining F from coastal Mexico shows the opposite result:  $F_{MX}$  only shares uniquely introgressed alleles with O, while apparent admixture between  $F_{MX}$  and S or V is a consequence of the shared ancestry of O with S and V.

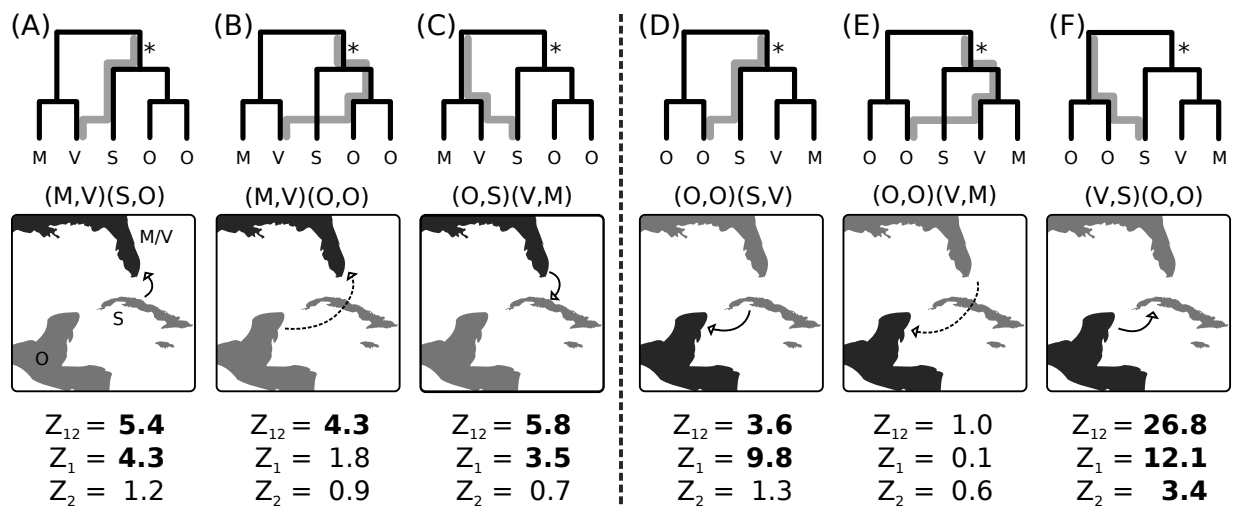

Figure 3: Partitioned D-statistics testing two hypotheses of divergence and gene-flow in the Cuban oak. In hypothesis 1 (A-C) S shares a MRCA with O (light gray on map); in hypothesis 2 (D-F) S shares a MRCA with the Florida clade (taxon abbreviations are as in Fig. 1). An asterisk marks the hypothesized ancestral relationship of S with either lineage. For each scenario sampled tips are shown in the following order (P1,P2)(P3<sub>1</sub>,P3<sub>2</sub>). The direction of introgression being tested is indicated by an arrow on the map, and a gray line traces the path on the topology through which shared ancestral P3 alleles are introduced into P2 to the exclusion of P1. D-statistics are reported as Z-scores.

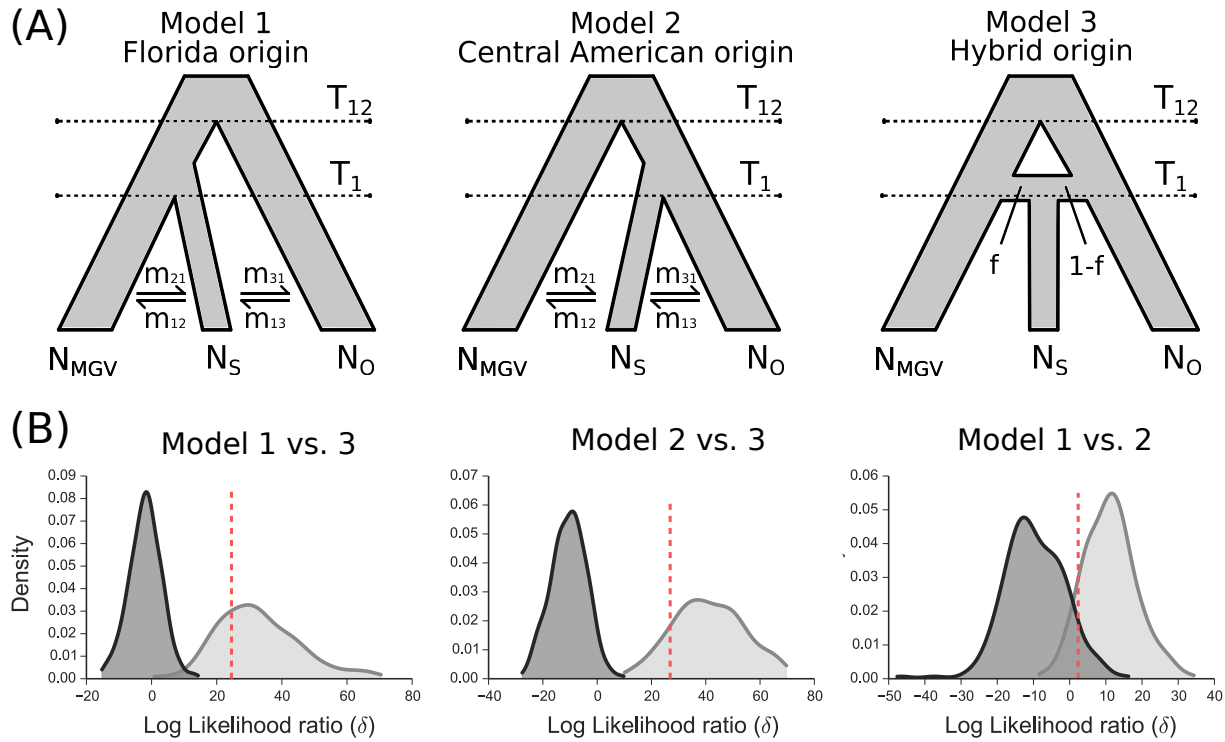

Figure 4: Three demographic models for the origin of the Cuban oak (*S*). (A) In models 1 and 2 (9 parameters) *S* is derived from one mainland taxon or the other (*O* or *MGV*; taxon names are abbreviated as in Fig. 1) with subsequent migration between Cuba and either mainland lineage. In model 3 (7 parameters) *S* forms through instantaneous admixture (hybrid speciation) and remains isolated thereafter. (B) Results of Monte Carlo model comparisons. Distributions of likelihood ratios ( $\delta$ ) show the difference in fit between models when data are simulated under one model or the other. The likelihood ratio fit between models for our observed data is shown in red ( $\delta_{obs}$ ). The proportion of the null model's  $\delta$  distribution (dark grey) to the right of  $\delta_{obs}$  measures the false positive rate, and the proportion of the alternative model's  $\delta$  distribution (light grey) that overlaps with the null distribution measures the power to reject the null. Model 2 is the best fit to our observed data.

Table S1: Taxon sampling and summary of RADseq data assembly.

| Taxon                   | Lat     | Long      | Location       | ID       | Nreadsx10 <sup>6</sup> | clusters | avg.depth <sup>a</sup> | cons.loci | H <sup>b</sup> | all_min4 <sup>c</sup> | all_min20 |
|-------------------------|---------|-----------|----------------|----------|------------------------|----------|------------------------|-----------|----------------|-----------------------|-----------|
| <i>Q. fusiformis</i>    | 22.5914 | -97.9064  | Mexico         | MXED8    | 1.06                   | 51618    | 17.84                  | 46176     | 0.0052         | 33976                 | 21865     |
| <i>Q. fusiformis</i>    | 25.2858 | -99.9467  | Mexico         | MXGT4    | 1.25                   | 58878    | 19.19                  | 52690     | 0.0052         | 39498                 | 23205     |
| <i>Q. fusiformis</i>    | 31.9472 | -97.6708  | Texas          | TXMD3    | 0.86                   | 46306    | 16.18                  | 41534     | 0.0051         | 30711                 | 20385     |
| <i>Q. fusiformis</i>    | 31.2814 | -97.7342  | Texas          | TXGR3    | 0.8                    | 42299    | 16.13                  | 37777     | 0.0053         | 27835                 | 18694     |
| <i>Q. sagraana</i>      | 22.3660 | -83.4300  | Cuba           | CUVN10   | 1.05                   | 52813    | 17.85                  | 47337     | 0.0050         | 36096                 | 22632     |
| <i>Q. sagraana</i>      | 22.2812 | -83.5235  | Cuba           | CUCA4    | 0.53                   | 32409    | 12.56                  | 28630     | 0.0050         | 21065                 | 13861     |
| <i>Q. sagraana</i>      | 22.4401 | -82.3645  | Cuba           | CUSV6    | 0.72                   | 42758    | 14.33                  | 38182     | 0.0049         | 28700                 | 18178     |
| <i>Q. sagraana</i>      | 22.3532 | -83.5653  | Cuba           | CUMM5    | 0.08                   | 3497     | 8.78                   | 1028      | 0.0037         | 0                     | 0         |
| <i>Q. oleoides</i>      | 17.9100 | -95.0206  | Mexico         | MXSA3017 | 0.96                   | 51137    | 15.79                  | 45915     | 0.0044         | 33088                 | 21446     |
| <i>Q. oleoides</i>      | 14.0333 | -86.5833  | Honduras       | HNDA09   | 1.03                   | 53078    | 17.66                  | 47566     | 0.0041         | 35908                 | 22620     |
| <i>Q. oleoides</i>      | 17.2412 | -88.7467  | Belize         | BZBB1    | 0.78                   | 44543    | 14.76                  | 39800     | 0.0043         | 29081                 | 19141     |
| <i>Q. oleoides</i>      | 10.7809 | -85.3617  | Costa Rica     | CRL0001  | 4.31                   | 94159    | 42.58                  | 80573     | 0.0045         | 51898                 | 25976     |
| <i>Q. oleoides</i>      | 11.0143 | -85.6366  | Costa Rica     | CRL0030  | 3.94                   | 88318    | 41.43                  | 80009     | 0.0033         | 51332                 | 27224     |
| <i>Q. brandegeei</i>    | 23.5001 | -110.0635 | Baja Calif.    | BJSL25   | 5.77                   | 82588    | 67.07                  | 74685     | 0.0043         | 52657                 | 27225     |
| <i>Q. brandegeei</i>    | 23.7665 | -110.0156 | Baja Calif.    | BJSB3    | 0.86                   | 46386    | 16.60                  | 41847     | 0.0041         | 31359                 | 20564     |
| <i>Q. brandegeei</i>    | 23.7039 | -110.1370 | Baja Calif.    | BJVL19   | 5.05                   | 78671    | 62.04                  | 71475     | 0.0041         | 51284                 | 27145     |
| <i>Q. minima</i>        | 27.3004 | -80.2751  | Florida        | FLSA185  | 3.40                   | 76141    | 42.13                  | 71185     | 0.0026         | 24280                 | 15877     |
| <i>Q. minima</i>        | 29.2054 | -82.9941  | Florida        | FLCK216  | 0.73                   | 42631    | 13.91                  | 37935     | 0.0052         | 27642                 | 17626     |
| <i>Q. minima</i>        | 29.6528 | -82.2805  | Florida        | FLMO62   | 0.84                   | 46671    | 15.65                  | 40077     | 0.0059         | 29944                 | 19959     |
| <i>Q. minima</i>        | 29.7144 | -82.4433  | Florida        | FLSF47   | 0.84                   | 46470    | 15.67                  | 41350     | 0.0054         | 30615                 | 20328     |
| <i>Q. geminata</i>      | 29.6046 | -81.1874  | Florida        | FLWO6    | 0.99                   | 57422    | 14.43                  | 50325     | 0.0043         | 28827                 | 19044     |
| <i>Q. geminata</i>      | 29.2072 | -82.9913  | Florida        | FLCK18   | 0.86                   | 48664    | 14.04                  | 43257     | 0.0048         | 29347                 | 19471     |
| <i>Q. geminata</i>      | 29.7350 | -82.4474  | Florida        | FLSF54   | 3.33                   | 76852    | 41.42                  | 68968     | 0.0051         | 51493                 | 27352     |
| <i>Q. geminata</i>      | 27.1837 | -81.3580  | Florida        | FLAB109  | 0.79                   | 131424   | 21.64                  | 121942    | 0.0030         | 45292                 | 25015     |
| <i>Q. virginiana</i>    | 29.7480 | -82.4553  | Florida        | FLSF33   | 0.79                   | 44437    | 15.08                  | 39682     | 0.0048         | 29114                 | 19204     |
| <i>Q. virginiana</i>    | 25.7262 | -82.2440  | Florida        | FLBA140  | 3.51                   | 78099    | 42.90                  | 70500     | 0.0047         | 51089                 | 27337     |
| <i>Q. virginiana</i>    | 30.4114 | -90.0535  | Louisiana      | LALC2    | 1.33                   | 59498    | 20.57                  | 53779     | 0.0047         | 40628                 | 24921     |
| <i>Q. virginiana</i>    | 32.5844 | -80.5702  | South Carolina | SCCU3    | 0.46                   | 25405    | 11.60                  | 22689     | 0.0043         | 15030                 | 9765      |
| <i>Q. virginiana</i>    | 29.8335 | -94.7394  | Texas          | TXWV2    | 0.14                   | 6976     | 10.40                  | 6206      | 0.0038         | 0                     | 0         |
| <i>Q. engelmannii</i>   | x       | x         | UMN greenhouse | EN       | 0.67                   | 37110    | 15.52                  | 32968     | 0.0048         | 23146                 | 14532     |
| <i>Q. arizonica</i>     | x       | x         | UMN greenhouse | AR       | 3.66                   | 74924    | 46.95                  | 67582     | 0.0046         | 45736                 | 24506     |
| <i>Q. durata</i>        | x       | x         | UMN greenhouse | DU       | 3.38                   | 75200    | 42.58                  | 67450     | 0.0043         | 44394                 | 24150     |
| <i>Q. douglasii</i>     | x       | x         | UMN greenhouse | DO       | 1.77                   | 62093    | 26.74                  | 55826     | 0.0050         | 39111                 | 22769     |
| <i>Q. nigra</i>         | x       | x         | UMN greenhouse | NI       | 4.06                   | 74716    | 52.19                  | 67608     | 0.0044         | 37135                 | 20779     |
| <i>Q. hemisphaerica</i> | x       | x         | UMN greenhouse | HE       | 2.54                   | 68620    | 35.66                  | 62294     | 0.0044         | 35432                 | 20480     |
| <i>Q. chrysolepis</i>   | x       | x         | UMN greenhouse | CH       | 4.11                   | 77128    | 50.63                  | 68924     | 0.0049         | 42670                 | 23326     |

<sup>a</sup> After excluding loci with depth <5.

<sup>b</sup> Heterozygosity, measured as the proportion of called sites.

<sup>c</sup> Number of loci from each given taxon in this assembled data set. Two samples were excluded for low data.



Table S2: Selected results of partitioned D-statistic tests investigating the origin of the Cuban oak. Taxon abbreviations are as labeled in Fig. 1, and are arranged such that the dominant signal, when present, is introgression of shared P3 alleles ( $D_{12}$ ) into P2 (ABBBA>BABBA). For each test the corresponding hypothetical scenario from Fig. 3 is indicated. Subscripts show sampling locations for the sampled individual used in each test: *HN*=Honduras, *LA*=Louisiana, *FL*=Florida, *MX*=Mexico.

| test | P1              | P2              | P3 <sub>1</sub> | P3 <sub>2</sub> | D <sub>12</sub> | D <sub>1</sub> | D <sub>2</sub> | Z <sub>12</sub> | Z <sub>1</sub> | Z <sub>2</sub> | scenario |
|------|-----------------|-----------------|-----------------|-----------------|-----------------|----------------|----------------|-----------------|----------------|----------------|----------|
| 26   | M               | G               | S               | O <sub>HN</sub> | 0.10            | 0.14           | 0.00           | 2.9             | 2.5            | 0.0            | A        |
| 27   | M               | V <sub>LA</sub> | S               | O <sub>HN</sub> | 0.16            | 0.12           | 0.04           | <b>5.0</b>      | 2.3            | 0.7            | A        |
| 28   | M               | V <sub>FL</sub> | S               | O <sub>HN</sub> | 0.17            | 0.21           | 0.07           | <b>5.4</b>      | <b>4.3</b>     | 1.2            | A        |
| 29   | G               | V <sub>LA</sub> | S               | O <sub>HN</sub> | 0.08            | 0.01           | 0.07           | 2.8             | 0.2            | 1.3            | A        |
| 30   | G               | V <sub>FL</sub> | S               | O <sub>HN</sub> | 0.06            | 0.09           | 0.03           | 1.7             | 1.8            | 0.6            | A        |
| 31   | V <sub>LA</sub> | V <sub>FL</sub> | S               | O <sub>HN</sub> | 0.01            | 0.09           | -0.02          | 0.2             | 2.0            | 0.3            | A        |
| 32   | M               | G               | O <sub>HN</sub> | O <sub>MX</sub> | 0.10            | 0.13           | -0.01          | 2.6             | 1.6            | 0.1            | B        |
| 33   | M               | V <sub>LA</sub> | O <sub>HN</sub> | O <sub>MX</sub> | 0.14            | 0.06           | 0.09           | <b>4.1</b>      | 0.8            | 1.4            | B        |
| 34   | M               | V <sub>FL</sub> | O <sub>HN</sub> | O <sub>MX</sub> | 0.16            | 0.13           | 0.07           | <b>4.3</b>      | 1.8            | 0.9            | B        |
| 35   | G               | V <sub>LA</sub> | O <sub>HN</sub> | O <sub>MX</sub> | 0.11            | -0.06          | 0.19           | <b>3.7</b>      | 1.0            | 2.8            | B        |
| 36   | G               | V <sub>FL</sub> | O <sub>HN</sub> | O <sub>MX</sub> | 0.07            | -0.05          | 0.11           | 2.1             | 0.7            | 1.7            | B        |
| 37   | V <sub>LA</sub> | V <sub>FL</sub> | O <sub>HN</sub> | O <sub>MX</sub> | -0.03           | 0.01           | -0.05          | 1.2             | 0.1            | 0.8            | B        |
| 38   | O <sub>HN</sub> | S               | G               | M               | 0.22            | 0.23           | 0.11           | <b>5.6</b>      | <b>3.4</b>     | 1.8            | C        |
| 39   | O <sub>HN</sub> | S               | V <sub>LA</sub> | M               | 0.21            | 0.21           | 0.13           | <b>6.9</b>      | <b>3.7</b>     | 2.1            | C        |
| 40   | O <sub>HN</sub> | S               | V <sub>FL</sub> | M               | 0.20            | 0.19           | 0.05           | <b>5.8</b>      | <b>3.5</b>     | 0.7            | C        |
| 41   | O <sub>HN</sub> | S               | V <sub>LA</sub> | G               | 0.25            | 0.20           | 0.25           | <b>8.0</b>      | <b>3.8</b>     | <b>5.0</b>     | C        |
| 42   | O <sub>HN</sub> | S               | V <sub>FL</sub> | G               | 0.23            | 0.23           | 0.17           | <b>7.1</b>      | <b>4.4</b>     | <b>3.4</b>     | C        |
| 43   | O <sub>HN</sub> | S               | V <sub>FL</sub> | V <sub>LA</sub> | 0.25            | 0.21           | 0.12           | <b>9.8</b>      | <b>4.1</b>     | 2.2            | C        |
| 44   | O <sub>MX</sub> | O <sub>HN</sub> | S               | G               | 0.17            | 0.27           | -0.08          | <b>5.7</b>      | <b>7.4</b>     | 1.2            | D        |
| 45   | O <sub>MX</sub> | O <sub>HN</sub> | S               | M               | 0.12            | 0.28           | -0.15          | <b>3.5</b>      | <b>7.8</b>     | 2.2            | D        |
| 46   | O <sub>MX</sub> | O <sub>HN</sub> | S               | V <sub>FL</sub> | 0.12            | 0.27           | -0.12          | <b>3.6</b>      | <b>9.8</b>     | 1.3            | D        |
| 47   | O <sub>MX</sub> | O <sub>HN</sub> | S               | V <sub>LA</sub> | 0.11            | 0.28           | -0.07          | <b>4.1</b>      | <b>8.4</b>     | 2.2            | D        |
| 48   | O <sub>MX</sub> | O <sub>HN</sub> | G               | M               | -0.01           | 0.08           | -0.06          | 0.3             | 1.0            | 0.8            | E        |
| 49   | O <sub>MX</sub> | O <sub>HN</sub> | V <sub>LA</sub> | M               | -0.01           | -0.02          | 0.03           | 0.2             | 0.3            | 0.4            | E        |
| 50   | O <sub>MX</sub> | O <sub>HN</sub> | V <sub>FL</sub> | M               | -0.05           | 0.01           | -0.05          | 1.0             | 0.1            | 0.6            | E        |
| 51   | O <sub>MX</sub> | O <sub>HN</sub> | V <sub>LA</sub> | G               | -0.00           | -0.19          | 0.05           | 0.1             | <b>3.3</b>     | 0.8            | E        |
| 52   | O <sub>MX</sub> | O <sub>HN</sub> | V <sub>FL</sub> | G               | 0.02            | -0.12          | 0.04           | 0.5             | 1.6            | 0.7            | E        |
| 53   | O <sub>MX</sub> | O <sub>HN</sub> | V <sub>FL</sub> | V <sub>LA</sub> | -0.01           | 0.08           | -0.06          | 0.3             | 1.0            | 0.8            | E        |
| 54   | G               | S               | O <sub>HN</sub> | O <sub>MX</sub> | 0.55            | 0.49           | 0.17           | <b>26.6</b>     | <b>11.1</b>    | <b>3.1</b>     | F        |
| 55   | M               | S               | O <sub>HN</sub> | O <sub>MX</sub> | 0.56            | 0.55           | 0.17           | <b>25.8</b>     | <b>15.1</b>    | 2.7            | F        |
| 56   | V <sub>FL</sub> | S               | O <sub>HN</sub> | O <sub>MX</sub> | 0.53            | 0.46           | 0.13           | <b>26.8</b>     | <b>12.1</b>    | <b>3.4</b>     | F        |
| 57   | V <sub>LA</sub> | S               | O <sub>HN</sub> | O <sub>MX</sub> | 0.52            | 0.48           | 0.12           | <b>27.3</b>     | <b>12.4</b>    | 2.7            | F        |

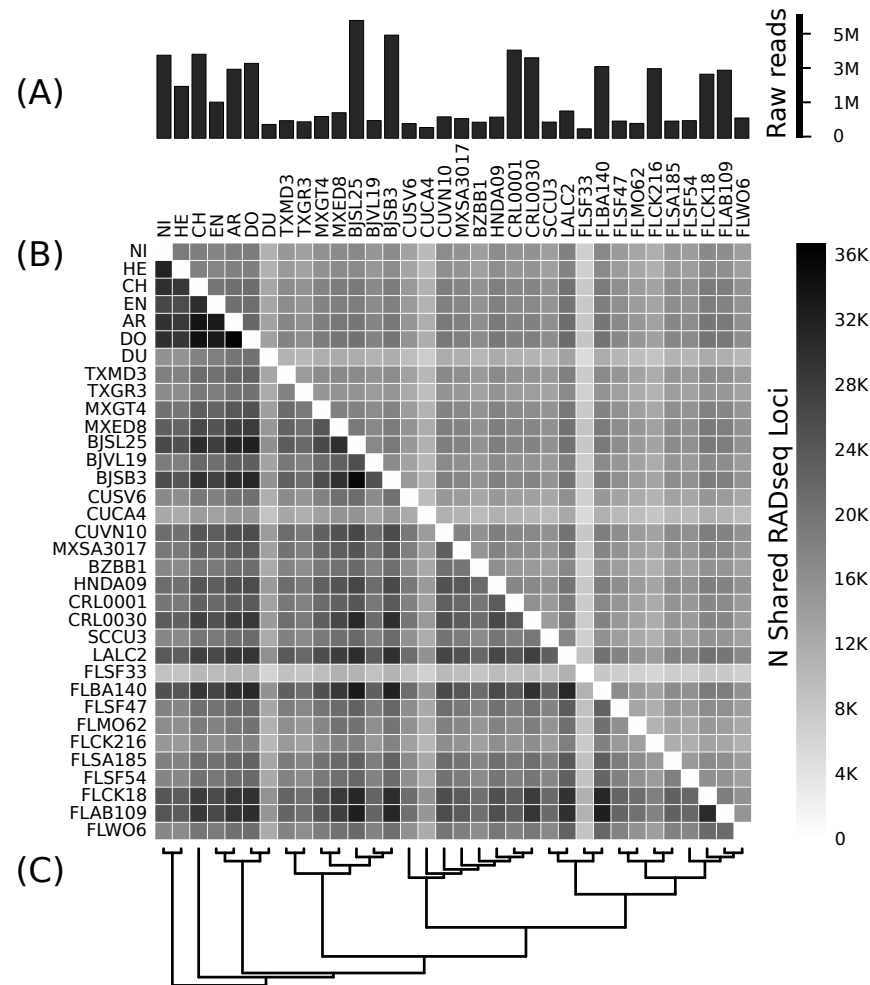

Figure S1: The distribution of shared RADseq loci between samples across two data sets with different thresholds for the minimum sample coverage. (A) The number of raw input reads at the beginning of bioinformatic analyses. (B) Heatmap of locus sharing across the two assembled data sets. The large but sparse “Allmin4” matrix (55.5% missing data) is below the diagonal while the smaller but more complete “Allmin20” matrix (26.6% missing data) is above the diagonal. (C) The inferred “Allmin20” topology.

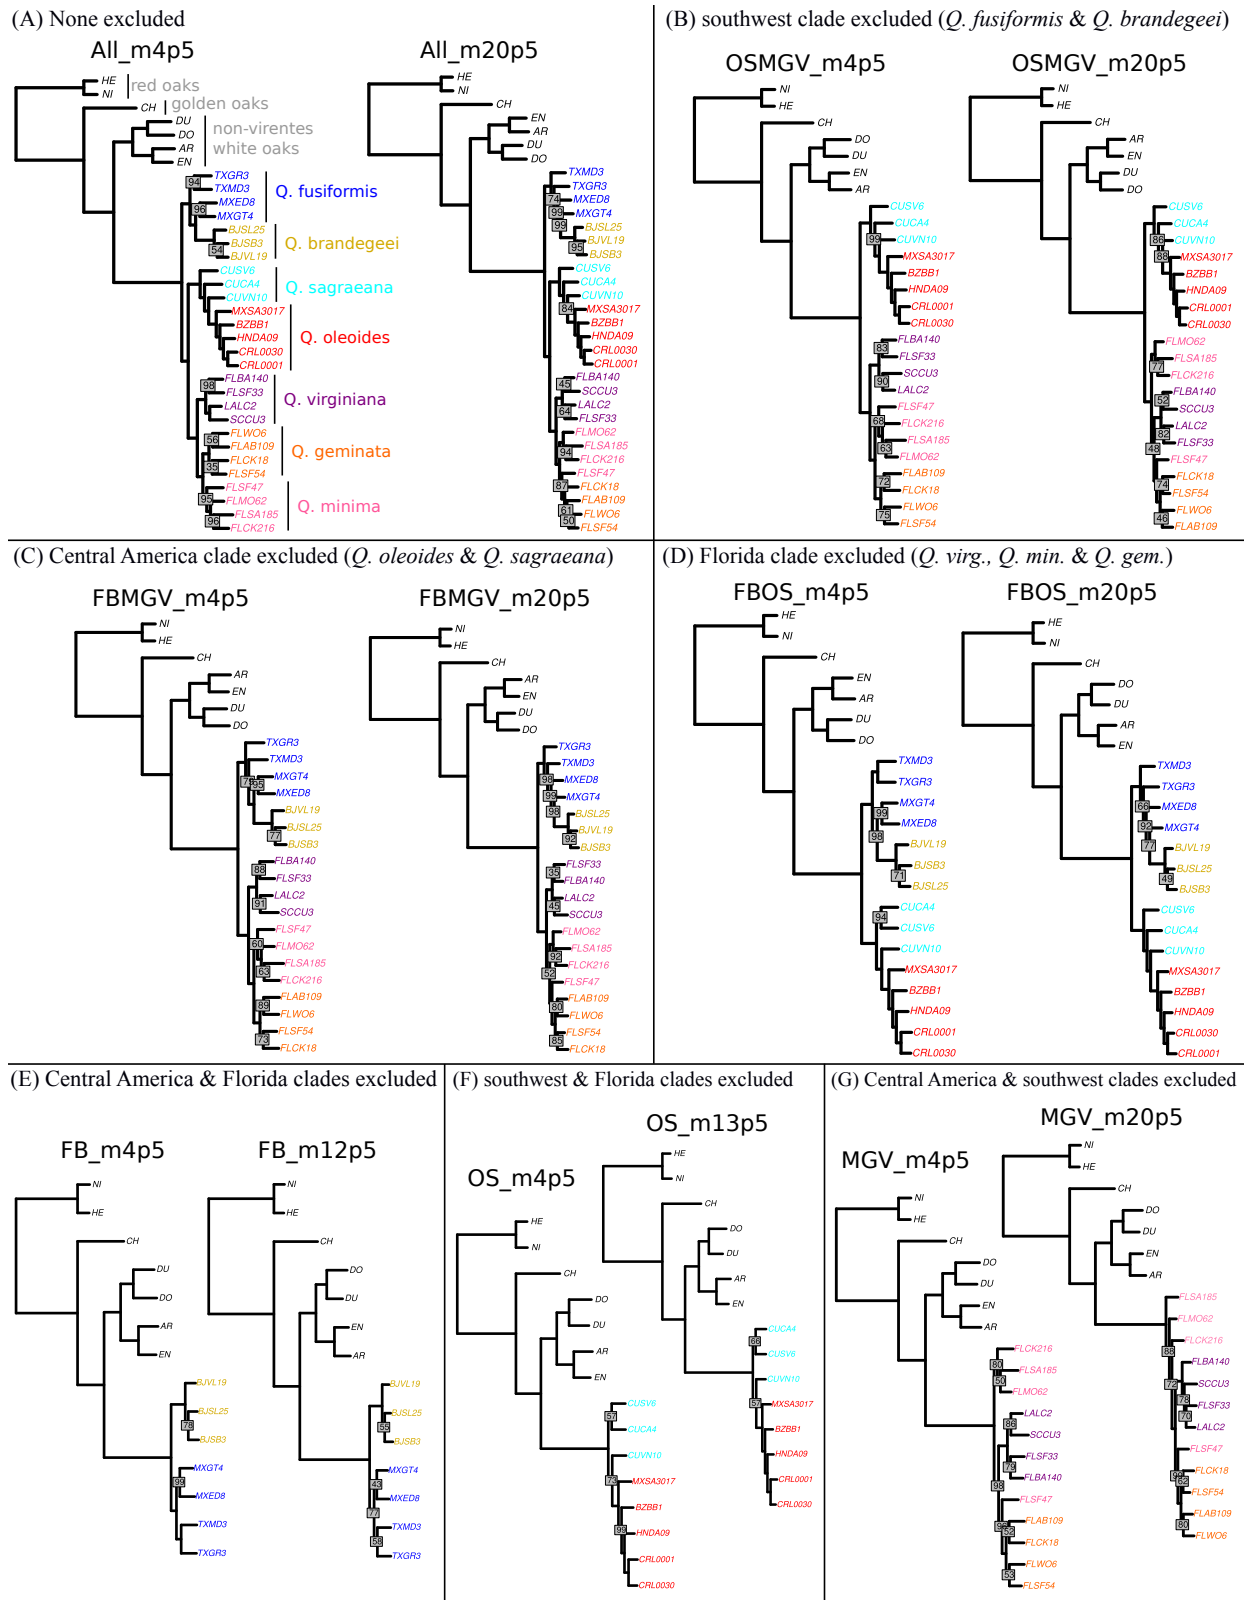

Figure S2: Rooted ML phylogenies inferred from 15 concatenated RADseq data sets. Bootstrap support is 100 except where indicated. Ingroup taxon sampling varies among data sets, but each shares the same seven outgroup taxa. For each subset of taxa both a sparse and more complete data set were generated. (E-F) Inferred relationships among closely related species or populations are different from the full tree (A) when taxa from distant clades, which may have exchanged genes, are analyzed separately.

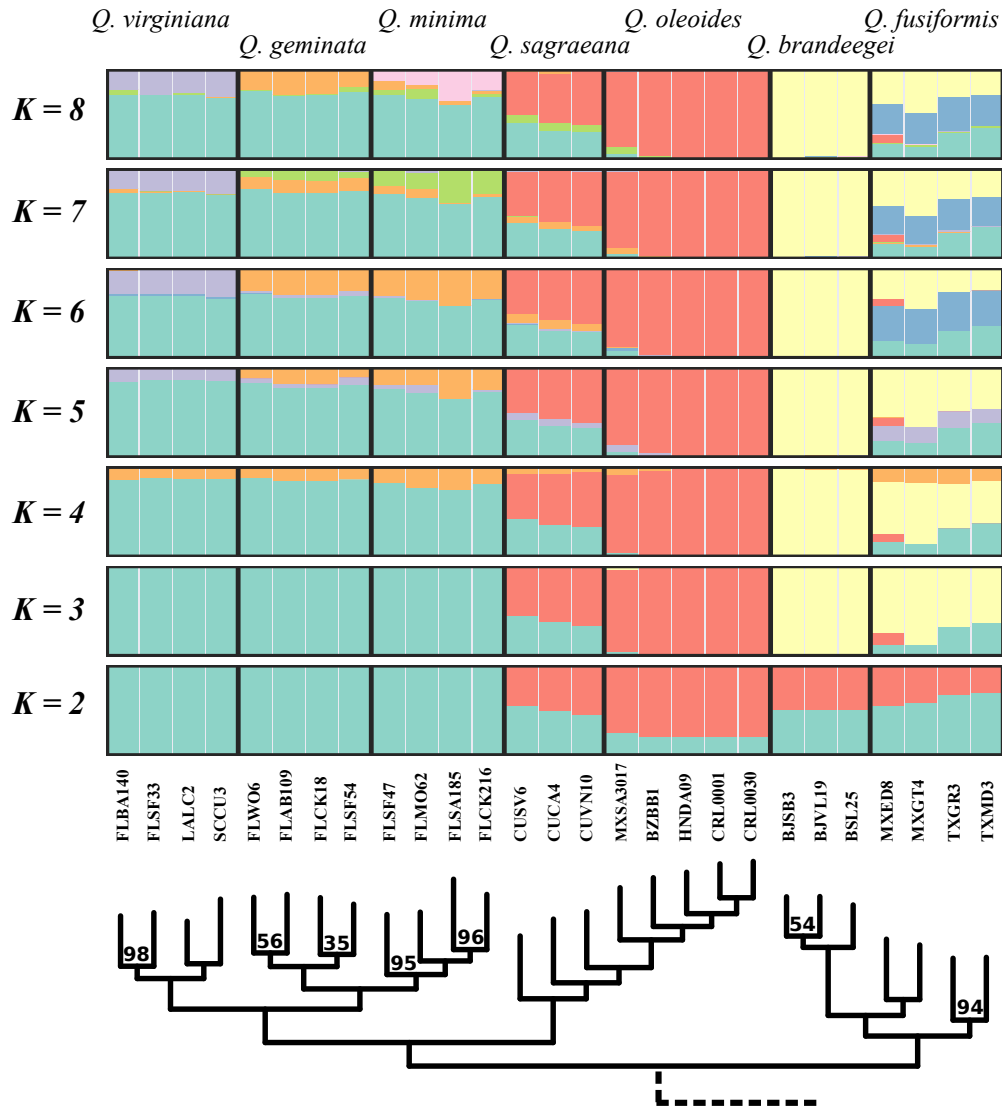

Figure S3: Population clustering with admixture for 27 live oak individuals inferred from 14K SNPs. Specimen IDs are shown. Outgroup taxa were excluded. Clustering was performed at values of  $K$  between 2–8. The rooted ML tree inferred from the (Allmin4) RADseq data set is also shown for reference. Bootstrap supports are 100 except where indicated.

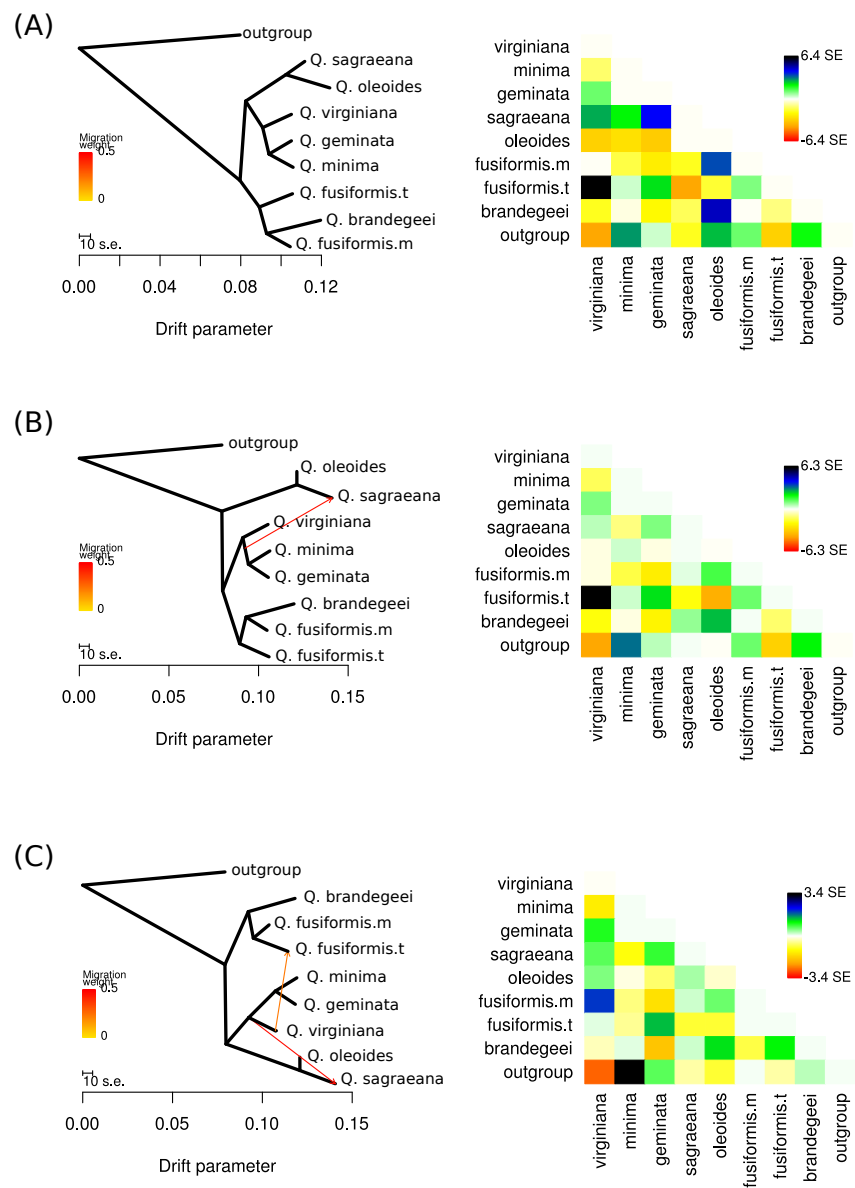

Figure S4: Population splits and admixtures for pooled population samples inferred by TreeMix, and the corresponding allele frequency covariance matrix. (A) A maximum likelihood tree inferred without admixture. (B) The population graph with one admixture edge. (C) The population graph with two admixture edges.
